# Supplementary material for: Portuguese Man-of-War (Physalia physalis) in the Mediterranean: A permanent invasion or a casual appearance?
Source: PubMed Central journal article supplement (PMC4480229; doi:10.1038/srep11545), 2015-06-25
Supplement: srep11545-s1.pdf [file srep11545-s1.pdf]

**Portuguese Man-of-War (*Physalia physalis*) in  
the Mediterranean: A permanent invasion or  
a casual appearance?**

L. Prieto, D. Macías, A. Peliz and J. Ruiz

# SUPPORTING INFORMATION

## **The Portuguese Man-of-War toxin: description and envenomation syndromes.**

The Portuguese Man-of-War, *Physalia physalis*, possesses a singularly potent toxin (Brunett 2000; Edwards & Hessinger 2000). The major protein of the venom is physalitin, a potent hemolysin (Tamkun & Hessinger 1981), contained in the nematocysts. The chemical characterization (Stillway 1974), collagenase activity<sup>28</sup> and cloning and functional expression of the cnidocytes (Bouchard *et al.* 2006) have been described. The nematocyst venom of *P. physalis* is lethal to animals and humans (Edwards & Hessinger 2000), and the envenomation syndromes in humans are extensive (Burnett 2000). Fatal reactions include immediate toxin-induced cardiac arrest and delayed renal failure. Systemic reactions include toxin-induced Irukandji reaction and respiratory acidosis, and local reactions include recurrent toxin-induced skin, mucosa and cornea reactions of up to four episodes, distant site reactions and local lymphadenopathy. Chronic reactions include contractions, vascular spasm and mononeuritis, post-episode dermatitis and granuloma annulare. Urticaria occurs as a reaction to ingestion.

### References used in Supplementary material and not in the paper:

1. Tamkun, M.M. & Hessinger, D.A. (1981) Isolation and partial characterization of a hemolytic and toxic protein from the nematocyst venom of the Portuguese Man-of-war, *Physalia physalis*. *Biochim. Biophys. Acta*, 667, 87-98 .
2. Stillway, L.W. (1974). Nematocyst lipids of the Portuguese Man-of-war *Physalia physalis*\*. *Comp. Biochem. Physiol.*, 48B, 35-38 .
3. Lal, D.M., Calton, G.J., Neeman, I. & Burnett, J.W. (1981). Characterization of *Physalia physalis* (Portuguese Man-O'War) nematocyst venom collagenase. *Comp. Biochem. Physiol.*, 70B, 635-638 .
4. Bouchard. C., Price, R.B., Money Penny, C.G., Thompson, L.F., Zillhardt, M., Stalheim, L. *et al.* (2006). Cloning and functional expression of voltage-gated ion channel subunits from cnidocytes of the Portuguese Man O'War *Physalia physalis*. *J. Exp. Biol.*, 209, 2979-2989 .

**Supplementary Table1 | List of sightings of Portuguese Man-of-War.** Total number of *Physalia physalis* sightings along the coast of the Mediterranean Sea, Iberian Peninsula (both at the Atlantic and Mediterranean coastlines) and Canary Islands. The quantity references are as follows: 0 (zero colonies), 1 (1 colony), 2 (2-5 colonies), 3 (6-10 colonies), 4 (11-99 colonies) and 5 (>100 colonies). Note: 559 jellyfish sightings were observed from 2005 to 2007, but none of them correspond to *Physalia physalis*. Nan: not specified. MMA: Spanish Ministry of Environment.

| Day | Month | Year | Quant | Latitude | Longitude | Beach/Port                 | Province         | Reference                                                                                                                                                                                                                                                                                                                       |
|-----|-------|------|-------|----------|-----------|----------------------------|------------------|---------------------------------------------------------------------------------------------------------------------------------------------------------------------------------------------------------------------------------------------------------------------------------------------------------------------------------|
| 23  | 8     | 2008 | 1     | 36.7316  | -3.7454   | La Herradura               | Granada          | MMA                                                                                                                                                                                                                                                                                                                             |
| 23  | 8     | 2008 | 3     | 36.6884  | -3.4682   | Salobreña                  | Granada          | MMA                                                                                                                                                                                                                                                                                                                             |
| 26  | 8     | 2008 | Nan   | 36.5870  | -4.5257   | Benalmádena                | Málaga           | MMA                                                                                                                                                                                                                                                                                                                             |
| 26  | 8     | 2008 | 1     | 36.7290  | -3.6553   | Torrenewva                 | Granada          | MMA                                                                                                                                                                                                                                                                                                                             |
| 29  | 8     | 2008 | 1     | 39.3654  | -9.3534   | Peniche                    | Portugal         | <a href="http://laurindaalves.blogs.sapo.pt/121964.html">http://laurindaalves.blogs.sapo.pt/121964.html</a>                                                                                                                                                                                                                     |
| 5   | 2     | 2009 | 3     | 36.4421  | -6.2382   | Camposoto                  | Cádiz            | pers comm                                                                                                                                                                                                                                                                                                                       |
| 26  | 4     | 2009 | 1     | 37.6000  | -0.7453   | Las Cañas                  | Murcia           | <a href="http://www.laverdad.es/murcia/20090427/local/region/aparece-nuevo-ejemplar-carabela-200904271709.html">http://www.laverdad.es/murcia/20090427/local/region/aparece-nuevo-ejemplar-carabela-200904271709.html</a>                                                                                                       |
| 26  | 4     | 2009 | 1     | 37.8243  | -0.7603   | San Pedro del Pinatar      | Murcia           | <a href="http://www.laverdad.es/murcia/20090427/local/region/aparece-nuevo-ejemplar-carabela-200904271709.html">http://www.laverdad.es/murcia/20090427/local/region/aparece-nuevo-ejemplar-carabela-200904271709.html</a>                                                                                                       |
| 27  | 4     | 2009 | 4     | 37.6099  | -0.7251   | Coast                      | Murcia           | <a href="http://www.abc.es/hemeroteca/historico-27-04-2009/abc/Nacional/avistan-en-la-costa-murciana-unas-medusas-cuya-picadura-puede-ser-mortal-92478111718.html">http://www.abc.es/hemeroteca/historico-27-04-2009/abc/Nacional/avistan-en-la-costa-murciana-unas-medusas-cuya-picadura-puede-ser-mortal-92478111718.html</a> |
| 3   | 5     | 2009 | 1     | 37.3999  | -1.5806   | Aguilas                    | Murcia           | <a href="http://www.abc.es/hemeroteca/historico-27-04-2009/abc/Nacional/avistan-en-la-costa-murciana-unas-medusas-cuya-picadura-puede-ser-mortal-92478111718.html">http://www.abc.es/hemeroteca/historico-27-04-2009/abc/Nacional/avistan-en-la-costa-murciana-unas-medusas-cuya-picadura-puede-ser-mortal-92478111718.html</a> |
| 3   | 6     | 2009 | Nan   | 28.1446  | -15.4325  | Las Canteras               | Gran Canaria     | MMA                                                                                                                                                                                                                                                                                                                             |
| 19  | 6     | 2009 | 2     | 35.8934  | -5.3112   | Sports Port                | Ceuta            | MMA                                                                                                                                                                                                                                                                                                                             |
| 29  | 6     | 2009 | 1     | 37.8575  | -0.7622   | Cala del Gato              | Murcia           | <a href="http://www.laverdad.es/murcia/20090630/local/orihuela/carabela-portuguesa-pica-playa-200906301633.html">http://www.laverdad.es/murcia/20090630/local/orihuela/carabela-portuguesa-pica-playa-200906301633.html</a>                                                                                                     |
| 30  | 6     | 2009 | 2     | 28.4824  | -16.2324  | Sports Port                | St Cruz Tenerife | MMA                                                                                                                                                                                                                                                                                                                             |
| 16  | 7     | 2009 | 2     | 28.5360  | -16.3926  | La Barranquera             | St Cruz Tenerife | MMA                                                                                                                                                                                                                                                                                                                             |
| 21  | 7     | 2009 | Nan   | 27.7664  | -15.5499  | Las Burra                  | Gran Canaria     | MMA                                                                                                                                                                                                                                                                                                                             |
| 24  | 7     | 2009 | 3     | 28.4804  | -16.2399  | Club Nautico               | St Cruz Tenerife | MMA                                                                                                                                                                                                                                                                                                                             |
| 30  | 7     | 2009 | 2     | 37.7310  | -0.7370   | La Manga                   | Murcia           | MMA                                                                                                                                                                                                                                                                                                                             |
| 30  | 7     | 2009 | 5     | 39.4330  | -9.2409   | Foz do Arelho              | Portugal         | <a href="http://www.destak.pl/artigo/37156-caravelas-portuguesas-continuum-a-dar-a-costa">http://www.destak.pl/artigo/37156-caravelas-portuguesas-continuum-a-dar-a-costa</a>                                                                                                                                                   |
| 4   | 8     | 2009 | 2     | 28.5360  | -16.3926  | La Barranquera             | St Cruz Tenerife | MMA                                                                                                                                                                                                                                                                                                                             |
| 11  | 8     | 2009 | 3     | 43.5612  | -7.1907   | Barreiros                  | Lugo             | <a href="http://www.lavozdegalicia.es/amarina/2009/08/12/0003_7902617.htm">http://www.lavozdegalicia.es/amarina/2009/08/12/0003_7902617.htm</a>                                                                                                                                                                                 |
| 13  | 8     | 2009 | 2     | 43.4757  | -3.7828   | Santander                  | Cantabria        | MMA                                                                                                                                                                                                                                                                                                                             |
| 24  | 8     | 2009 | 1     | 43.4710  | -3.9313   | Portio, Piélagos           | Cantabria        | MMA                                                                                                                                                                                                                                                                                                                             |
| 26  | 8     | 2009 | 1     | 43.3523  | -3.1362   | Muskiz                     | Vizcaya          | MMA                                                                                                                                                                                                                                                                                                                             |
| 26  | 8     | 2009 | 2     | 43.4316  | -3.8029   | Sports Port                | Cantabria        | MMA                                                                                                                                                                                                                                                                                                                             |
| 27  | 8     | 2009 | 2     | 43.4672  | -3.7702   | Isla de la Torre           | Cantabria        | MMA                                                                                                                                                                                                                                                                                                                             |
| 27  | 8     | 2009 | 1     | 43.4757  | -3.7828   | Santander                  | Cantabria        | MMA                                                                                                                                                                                                                                                                                                                             |
| 29  | 8     | 2009 | 1     | 43.4922  | -3.5391   | Jovel, Noja                | Cantabria        | MMA                                                                                                                                                                                                                                                                                                                             |
| 31  | 8     | 2009 | 1     | 43.3869  | -3.2248   | Castro Urdiales            | Cantabria        | MMA                                                                                                                                                                                                                                                                                                                             |
| 1   | 9     | 2009 | 2     | 28.6394  | -17.7571  | Breña Baja                 | St Cruz Tenerife | MMA                                                                                                                                                                                                                                                                                                                             |
| 1   | 9     | 2009 | 2     | 28.6394  | -17.7571  | Breña Baja                 | St Cruz Tenerife | MMA                                                                                                                                                                                                                                                                                                                             |
| 5   | 9     | 2009 | 1     | 43.4461  | -3.9716   | Valdearenas, Piélagos      | Cantabria        | MMA                                                                                                                                                                                                                                                                                                                             |
| 6   | 9     | 2009 | 1     | 43.4031  | -3.3207   | Arenillas, Castro Urdiales | Cantabria        | MMA                                                                                                                                                                                                                                                                                                                             |
| 10  | 9     | 2009 | 1     | 43.3747  | -3.2113   | Brazomar, Castro Urdiales  | Cantabria        | MMA                                                                                                                                                                                                                                                                                                                             |
| 11  | 9     | 2009 | 1     | 43.4356  | -4.0399   | La Concha, Suances         | Cantabria        | MMA                                                                                                                                                                                                                                                                                                                             |
| 11  | 9     | 2009 | 1     | 43.4311  | -4.0755   | Taqle, Suances             | Cantabria        | MMA                                                                                                                                                                                                                                                                                                                             |
| 14  | 9     | 2009 | 1     | 43.3834  | -3.0053   | La Salvaje, Sopelana       | Vizcaya          | MMA                                                                                                                                                                                                                                                                                                                             |
| 15  | 9     | 2009 | 1     | 43.2878  | -2.1707   | Zarauz                     | Guipúzcoa        | MMA                                                                                                                                                                                                                                                                                                                             |
| 22  | 2     | 2010 | 5     | 36.9907  | -6.5499   | Matalascañas               | Huelva           | Consejería de Medio Ambiente                                                                                                                                                                                                                                                                                                    |
| 22  | 2     | 2010 | 5     | 36.9843  | -6.5331   | Ranchos                    | Huelva           | Consejería de Medio Ambiente                                                                                                                                                                                                                                                                                                    |
| 22  | 2     | 2010 | 5     | 36.9558  | -6.4952   | Torrecañonero              | Huelva           | Consejería de Medio Ambiente                                                                                                                                                                                                                                                                                                    |
| 22  | 2     | 2010 | 5     | 36.8902  | -6.4337   | Zalabar                    | Huelva           | Consejería de Medio Ambiente                                                                                                                                                                                                                                                                                                    |
| 22  | 2     | 2010 | 5     | 36.8280  | -6.4031   | Inglesillo                 | Huelva           | Consejería de Medio Ambiente                                                                                                                                                                                                                                                                                                    |
| 22  | 2     | 2010 | 0     | 36.7966  | -6.3748   | Malandar                   | Huelva           | Consejería de Medio Ambiente                                                                                                                                                                                                                                                                                                    |
| 23  | 2     | 2010 | 5     | 37.0640  | -6.6758   | Asperillo occidental       | Huelva           | Consejería de Medio Ambiente                                                                                                                                                                                                                                                                                                    |
| 23  | 2     | 2010 | 5     | 37.0415  | -6.6325   | Asperillo oriental         | Huelva           | Consejería de Medio Ambiente                                                                                                                                                                                                                                                                                                    |
| 25  | 2     | 2010 | 5     | 36.8736  | -6.4329   | Doñana                     | Huelva           | pers communication                                                                                                                                                                                                                                                                                                              |
| 26  | 2     | 2010 | 0     | 37.1347  | -6.8374   | Mazaqón                    | Huelva           | Consejería de Medio Ambiente                                                                                                                                                                                                                                                                                                    |
| 26  | 2     | 2010 | 5     | 37.1049  | -6.7587   | Rompecullos                | Huelva           | Consejería de Medio Ambiente                                                                                                                                                                                                                                                                                                    |
| 2   | 3     | 2010 | 3     | 36.1389  | -5.3408   | Gibraltar                  | Cádiz            | <a href="http://www.publico.es/ciencias/298861/alerta/litoral/andaluz/medusa/peligrosa">http://www.publico.es/ciencias/298861/alerta/litoral/andaluz/medusa/peligrosa</a>                                                                                                                                                       |
| 2   | 3     | 2010 | 0     | 37.1347  | -6.8374   | Mazaqón                    | Huelva           | Consejería de Medio Ambiente                                                                                                                                                                                                                                                                                                    |
| 2   | 3     | 2010 | 3     | 37.1270  | -6.8084   | Alcor                      | Huelva           | Consejería de Medio Ambiente                                                                                                                                                                                                                                                                                                    |
| 2   | 3     | 2010 | 4     | 37.1105  | -6.7707   | Mazaqón                    | Huelva           | Consejería de Medio Ambiente                                                                                                                                                                                                                                                                                                    |
| 2   | 3     | 2010 | 3     | 37.0954  | -6.7396   | Arenosillo                 | Huelva           | Consejería de Medio Ambiente                                                                                                                                                                                                                                                                                                    |
| 3   | 3     | 2010 | 2     | 37.0002  | -8.0032   | Faro                       | Portugal         | <a href="http://www.meteopt.com/forum/seguimento-meteorologico/seguimento-sul-marco-2010-a-4317-3.html">http://www.meteopt.com/forum/seguimento-meteorologico/seguimento-sul-marco-2010-a-4317-3.html</a>                                                                                                                       |
| 3   | 3     | 2010 | 4     | 36.1844  | -6.0081   | Caños de Meca              | Cádiz            | Consejería de Medio Ambiente                                                                                                                                                                                                                                                                                                    |
| 3   | 3     | 2010 | 2     | 36.1868  | -5.9447   | Hierbabuena                | Cádiz            | Consejería de Medio Ambiente                                                                                                                                                                                                                                                                                                    |
| 3   | 3     | 2010 | 0     | 36.1864  | -5.9226   | Barbate                    | Cádiz            | Consejería de Medio Ambiente                                                                                                                                                                                                                                                                                                    |
| 3   | 3     | 2010 | 4     | 36.1864  | -5.9226   | Barbate                    | Cádiz            | Consejería de Medio Ambiente                                                                                                                                                                                                                                                                                                    |
| 3   | 3     | 2010 | 4     | 36.1359  | -5.8488   | Zahara                     | Cádiz            | Consejería de Medio Ambiente                                                                                                                                                                                                                                                                                                    |
| 3   | 3     | 2010 | 0     | 36.0684  | -5.6930   | Valdevaqueros              | Cádiz            | Consejería de Medio Ambiente                                                                                                                                                                                                                                                                                                    |
| 3   | 3     | 2010 | 0     | 36.7396  | -4.0904   | Torre del Mar              | Málaga           | Consejería de Medio Ambiente                                                                                                                                                                                                                                                                                                    |
| 3   | 3     | 2010 | 0     | 36.7266  | -3.9563   | Lindes                     | Málaga           | Consejería de Medio Ambiente                                                                                                                                                                                                                                                                                                    |
| 3   | 3     | 2010 | 0     | 36.7377  | -3.9262   | Calaceite                  | Málaga           | Consejería de Medio Ambiente                                                                                                                                                                                                                                                                                                    |
| 3   | 3     | 2010 | 0     | 36.7435  | -3.9009   | Playazo                    | Málaga           | Consejería de Medio Ambiente                                                                                                                                                                                                                                                                                                    |
| 3   | 3     | 2010 | 0     | 36.7316  | -3.7454   | La Herradura               | Granada          | Consejería de Medio Ambiente                                                                                                                                                                                                                                                                                                    |
| 3   | 3     | 2010 | 4     | 36.7292  | -3.6955   | Peñón del Santo            | Granada          | Consejería de Medio Ambiente                                                                                                                                                                                                                                                                                                    |
| 3   | 3     | 2010 | 0     | 36.7383  | -3.6687   | Veilla                     | Granada          | Consejería de Medio Ambiente                                                                                                                                                                                                                                                                                                    |
| 3   | 3     | 2010 | 4     | 36.7322  | -3.5882   | Charca                     | Granada          | Consejería de Medio Ambiente                                                                                                                                                                                                                                                                                                    |
| 3   | 3     | 2010 | 2     | 36.7135  | -3.5489   | Charca                     | Granada          | Consejería de Medio Ambiente                                                                                                                                                                                                                                                                                                    |
| 3   | 3     | 2010 | 4     | 36.7293  | -2.8877   | Balearma                   | Almería          | Consejería de Medio Ambiente                                                                                                                                                                                                                                                                                                    |
| 3   | 3     | 2010 | 1     | 36.7045  | -2.8066   | Almerimar                  | Almería          | Consejería de Medio Ambiente                                                                                                                                                                                                                                                                                                    |
| 3   | 3     | 2010 | 4     | 36.6831  | -2.7005   | Punta Entinas              | Almería          | Consejería de Medio Ambiente                                                                                                                                                                                                                                                                                                    |
| 3   | 3     | 2010 | 0     | 36.7645  | -2.6046   | Roqueatas                  | Almería          | Consejería de Medio Ambiente                                                                                                                                                                                                                                                                                                    |
| 3   | 3     | 2010 | 4     | 36.8366  | -2.3813   | El Alquíán                 | Almería          | Consejería de Medio Ambiente                                                                                                                                                                                                                                                                                                    |
| 3   | 3     | 2010 | 2     | 36.8209  | -2.2915   | Torre García               | Almería          | Consejería de Medio Ambiente                                                                                                                                                                                                                                                                                                    |
| 3   | 3     | 2010 | 4     | 36.8173  | -2.4371   | El Charco                  | Almería          | Consejería de Medio Ambiente                                                                                                                                                                                                                                                                                                    |
| 4   | 3     | 2010 | 0     | 36.1664  | -5.4374   | Getares                    | Cádiz            | Consejería de Medio Ambiente                                                                                                                                                                                                                                                                                                    |
| 4   | 3     | 2010 | 0     | 36.1573  | -5.4438   | Palmones                   | Cádiz            | Consejería de Medio Ambiente                                                                                                                                                                                                                                                                                                    |
| 4   | 3     | 2010 | 0     | 36.1801  | -5.3854   | Pte. Mayorga               | Cádiz            | Consejería de Medio Ambiente                                                                                                                                                                                                                                                                                                    |
| 4   | 3     | 2010 | 4     | 36.1775  | -5.3357   | La Atunara                 | Cádiz            | Consejería de Medio Ambiente                                                                                                                                                                                                                                                                                                    |
| 4   | 3     | 2010 | 0     | 36.2826  | -5.2788   | Sotogrande                 | Cádiz            | Consejería de Medio Ambiente                                                                                                                                                                                                                                                                                                    |
| 4   | 3     | 2010 | 0     | 36.3817  | -5.2105   | Torre de la Sal            | Málaga           | Consejería de Medio Ambiente                                                                                                                                                                                                                                                                                                    |
| 4   | 3     | 2010 | 0     | 36.4663  | -4.9957   | Guadalmina                 | Málaga           | Consejería de Medio Ambiente                                                                                                                                                                                                                                                                                                    |
| 4   | 3     | 2010 | 4     | 36.5036  | -4.6758   | Mijas                      | Málaga           | Consejería de Medio Ambiente                                                                                                                                                                                                                                                                                                    |
| 4   | 3     | 2010 | 1     | 36.5083  | -4.6372   | Calaburras                 | Málaga           | Consejería de Medio Ambiente                                                                                                                                                                                                                                                                                                    |
| 4   | 3     | 2010 | 3     | 36.7128  | -4.3122   | Rincón                     | Málaga           | Consejería de Medio Ambiente                                                                                                                                                                                                                                                                                                    |
| 4   | 3     | 2010 | 2     | 36.6954  | -3.4451   | Carchuna                   | Granada          | Consejería de Medio Ambiente                                                                                                                                                                                                                                                                                                    |
| 4   | 3     | 2010 | 0     | 36.7229  | -3.3563   | Castell de Ferro           | Granada          | Consejería de Medio Ambiente                                                                                                                                                                                                                                                                                                    |
| 4   | 3     | 2010 | 4     | 36.7497  | -3.2391   | Melicena                   | Granada          | Consejería de Medio Ambiente                                                                                                                                                                                                                                                                                                    |
| 4   | 3     | 2010 | 4     | 36.7461  | -3.1738   | La Rábida                  | Granada          | Consejería de Medio Ambiente                                                                                                                                                                                                                                                                                                    |
| 4   | 3     | 2010 | 4     | 36.8259  | -2.4500   | Zapillo                    | Almería          | Consejería de Medio Ambiente                                                                                                                                                                                                                                                                                                    |
| 4   | 3     | 2010 | 2     | 36.7286  | -2.1547   | Monsul                     | Almería          | Consejería de Medio Ambiente                                                                                                                                                                                                                                                                                                    |
| 5   | 3     | 2010 | 3     | 35.8934  | -5.3112   | Ceuta                      | Ceuta            | <a href="http://www.abc.es/agencias/noticia.asp?noticia=333982">http://www.abc.es/agencias/noticia.asp?noticia=333982</a>                                                                                                                                                                                                       |
| 5   | 3     | 2010 | 4     | 36.4924  | -6.2701   | Cortadura                  | Cádiz            | Consejería de Medio Ambiente                                                                                                                                                                                                                                                                                                    |
| 5   | 3     | 2010 | 2     | 36.4421  | -6.2382   | Camposoto                  | Cádiz            | Consejería de Medio Ambiente                                                                                                                                                                                                                                                                                                    |
| 5   | 3     | 2010 | 4     | 36.0209  | -5.6159   | Los Lances                 | Cádiz            | Consejería de Medio Ambiente                                                                                                                                                                                                                                                                                                    |
| 5   | 3     | 2010 | 0     | 36.7431  | -2.1187   | Genoveses                  | Almería          | Consejería de Medio Ambiente                                                                                                                                                                                                                                                                                                    |
| 5   | 3     | 2010 | 0     | 36.7592  | -2.1051   | San José                   | Almería          | Consejería de Medio Ambiente                                                                                                                                                                                                                                                                                                    |
| 5   | 3     | 2010 | 0     | 36.9376  | -1.9341   | Aqua Amarga                | Almería          | Consejería de Medio Ambiente                                                                                                                                                                                                                                                                                                    |
| 5   | 3     | 2010 | 0     | 36.9863  | -1.9015   | Punta Muertos              | Almería          | Consejería de Medio Ambiente                                                                                                                                                                                                                                                                                                    |
| 10  | 3     | 2010 | 3     | 36.7232  | -4.1291   | Almayate                   | Málaga           | <a href="http://www.elmundo.es/elmundo/2010/03/10/andalucia_malaga/1268241604.html">http://www.elmundo.es/elmundo/2010/03/10/andalucia_malaga/1268241604.html</a>                                                                                                                                                               |
| 20  | 3     | 2010 | 1     | 35.8934  | -5.3112   | Ceuta                      | Ceuta            | <a href="http://www.abc.es/agencias/noticia.asp?noticia=333982">http://www.abc.es/agencias/noticia.asp?noticia=333982</a>                                                                                                                                                                                                       |
| 25  | 3     | 2010 | 3     | 36.1389  | -5.3408   | Gibraltar                  | Cádiz            | <a href="http://www.andaluciainformacion.es/portada/?a=1154526&amp;i=178f=0">http://www.andaluciainformacion.es/portada/?a=1154526&amp;i=178f=0</a>                                                                                                                                                                             |
| 25  | 3     | 2010 | 1     | 36.5500  | -2.46     | Alborán                    | Almería          | Consejería de Medio Ambiente                                                                                                                                                                                                                                                                                                    |
| 26  | 3     | 2010 | 2     | 36.8315  | -2.3173   | Retamar                    | Almería          | Consejería de Medio Ambiente                                                                                                                                                                                                                                                                                                    |
| 26  | 3     | 2010 | 2     | 36.8088  | -2.4306   | Salida Andarax             | Almería          | Consejería de Medio Ambiente                                                                                                                                                                                                                                                                                                    |
| 27  | 3     | 2010 | 2     | 36.7470  | -3.0529   | El Lance, Adra             | Almería          | Consejería de Medio Ambiente                                                                                                                                                                                                                                                                                                    |
| 4   | 4     | 2010 | 3     | 42.2495  | -8.7949   | Areamililla Canaas         | Pontevedra       | <a href="http://www.faroavigo.es/portada-o-morrazo/2010/04/04/proteccion-civil-retira-47-medusas-muertas-playa-areamililla/425879.html">http://www.faroavigo.es/portada-o-morrazo/2010/04/04/proteccion-civil-retira-47-medusas-muertas-playa-areamililla/425879.html</a>                                                       |
| 5   | 4     | 2010 | 3     | 35.8934  | -5.3112   | Ceuta                      | Ceuta            | <a href="http://www.abc.es/agencias/noticia.asp?noticia=333982">http://www.abc.es/agencias/noticia.asp?noticia=333982</a>                                                                                                                                                                                                       |
| 11  | 4     | 2010 | 2     | 36.7293  | -2.8877   | Balearma, El Ejido         | Almería          | Consejería de Medio Ambiente                                                                                                                                                                                                                                                                                                    |

|    |   |      |     |         |                                     |           |                                                                                                                                                                                                                                                                                                                                                         |
|----|---|------|-----|---------|-------------------------------------|-----------|---------------------------------------------------------------------------------------------------------------------------------------------------------------------------------------------------------------------------------------------------------------------------------------------------------------------------------------------------------|
| 16 | 4 | 2010 | 1   | 36.7882 | -2.5815 Bajos Roquetas              | Almeria   | Consejería de Medio Ambiente                                                                                                                                                                                                                                                                                                                            |
| 16 | 4 | 2010 | 2   | 36.7015 | -2.6432 Cerrillos                   | Almeria   | Consejería de Medio Ambiente                                                                                                                                                                                                                                                                                                                            |
| 16 | 4 | 2010 | 1   | 36.7431 | -2.1187 Genoveses                   | Almeria   | Consejería de Medio Ambiente                                                                                                                                                                                                                                                                                                                            |
| 16 | 4 | 2010 | 3   | 36.7470 | -3.0529 El Lance, Adra              | Almeria   | Consejería de Medio Ambiente                                                                                                                                                                                                                                                                                                                            |
| 16 | 4 | 2010 | 4   | 37.2148 | -1.8011 El playazo                  | Almeria   | Consejería de Medio Ambiente                                                                                                                                                                                                                                                                                                                            |
| 21 | 4 | 2010 | 3   | 36.6831 | -2.7005 Punta entinas-Sabinal       | Almeria   | <a href="http://www.europapress.es/andalucia/almeria-00350/noticia-retiran-40-ejemplares-medusas-carabela-portuguesa-frente-litoral-punta-entinas-sabinal-20100421173427.html">http://www.europapress.es/andalucia/almeria-00350/noticia-retiran-40-ejemplares-medusas-carabela-portuguesa-frente-litoral-punta-entinas-sabinal-20100421173427.html</a> |
| 30 | 4 | 2010 | 1   | 38.5988 | -0.0468 Altea                       | Alicante  | <a href="http://www.diarioinformacion.com/alicante/2010/04/30/travesia-peligrosa-carabela/1004284.html">http://www.diarioinformacion.com/alicante/2010/04/30/travesia-peligrosa-carabela/1004284.html</a>                                                                                                                                               |
| 30 | 4 | 2010 | 1   | 38.5338 | -0.1297 Benidorm                    | Alicante  | <a href="http://www.diarioinformacion.com/alicante/2010/04/30/travesia-peligrosa-carabela/1004284.html">http://www.diarioinformacion.com/alicante/2010/04/30/travesia-peligrosa-carabela/1004284.html</a>                                                                                                                                               |
| 30 | 4 | 2010 | 1   | 38.4273 | -0.3875 El Campello                 | Alicante  | <a href="http://www.diarioinformacion.com/alicante/2010/04/30/travesia-peligrosa-carabela/1004284.html">http://www.diarioinformacion.com/alicante/2010/04/30/travesia-peligrosa-carabela/1004284.html</a>                                                                                                                                               |
| 30 | 4 | 2010 | 1   | 38.1668 | -0.4708 Tabarca                     | Alicante  | <a href="http://www.diarioinformacion.com/alicante/2010/04/30/travesia-peligrosa-carabela/1004284.html">http://www.diarioinformacion.com/alicante/2010/04/30/travesia-peligrosa-carabela/1004284.html</a>                                                                                                                                               |
| 30 | 4 | 2010 | 1   | 37.5583 | -1.2692 Mazarrón                    | Murcia    | <a href="http://www.laopiniondemurcia.es/municipios/2010/04/30/avistan-decena-carabelas-portuguesas-costa-murciana/244216.html">http://www.laopiniondemurcia.es/municipios/2010/04/30/avistan-decena-carabelas-portuguesas-costa-murciana/244216.html</a>                                                                                               |
| 30 | 4 | 2010 | 1   | 38.1872 | -0.5545 Puerto                      | Alicante  | <a href="http://www.diarioinformacion.com/alicante/2010/04/30/travesia-peligrosa-carabela/1004284.html">http://www.diarioinformacion.com/alicante/2010/04/30/travesia-peligrosa-carabela/1004284.html</a>                                                                                                                                               |
| 4  | 5 | 2010 | 1   | 38.2603 | -0.5166 Arenales del Sol            | Alicante  | <a href="http://www.diarioinformacion.com/elche/2010/05/04/temida-carabela-deja-huella-playa-arenales/1005493.html">http://www.diarioinformacion.com/elche/2010/05/04/temida-carabela-deja-huella-playa-arenales/1005493.html</a>                                                                                                                       |
| 8  | 5 | 2010 | 1   | 37.3999 | -1.5806 Aguilas                     | Murcia    | <a href="http://www.murcia.com/aguilas/noticias/2010/05/08-ava-aleria-sobre-llegada-a.asp">http://www.murcia.com/aguilas/noticias/2010/05/08-ava-aleria-sobre-llegada-a.asp</a>                                                                                                                                                                         |
| 29 | 5 | 2010 | 4   | 37.0600 | -8.1000 Albufeira                   | Portugal  | <a href="http://www.jellywatch.org/sightings_list">http://www.jellywatch.org/sightings_list</a>                                                                                                                                                                                                                                                         |
| 12 | 6 | 2010 | 3   | 38.3410 | -0.4611 Coast                       | Alicante  | <a href="http://www.gentevalencia.com/noticias/medusas-peligrosas-en-las-costas-valencianas/870/">http://www.gentevalencia.com/noticias/medusas-peligrosas-en-las-costas-valencianas/870/</a>                                                                                                                                                           |
| 21 | 6 | 2010 | 3   | 36.0101 | -5.3381 Strait of Gibraltar         | Ceuta     | <a href="http://www.eferverde.com/es/contenidos/noticias/21-junio-2010-13-12-00-medusa-peligrosa-en-las-aguas-del-estrecho-aunque-lejos-de-la-costa">http://www.eferverde.com/es/contenidos/noticias/21-junio-2010-13-12-00-medusa-peligrosa-en-las-aguas-del-estrecho-aunque-lejos-de-la-costa</a>                                                     |
| 9  | 7 | 2010 | Nan | 38.2603 | -0.5166 Arenales del Sol            | Alicante  | MMA                                                                                                                                                                                                                                                                                                                                                     |
| 11 | 7 | 2010 | 2   | 43.3199 | -1.9869 La Concha                   | Guipuzcoa | MMA                                                                                                                                                                                                                                                                                                                                                     |
| 11 | 7 | 2010 | 3   | 43.2878 | -2.1707 Zarautz                     | Guipuzcoa | MMA                                                                                                                                                                                                                                                                                                                                                     |
| 12 | 7 | 2010 | 1   | 43.3199 | -1.9869 La Concha                   | Guipuzcoa | <a href="http://www.diariovasco.com/v/20100717/al-dia-local/detectan-concha-hondarribia-zarautz-20100717.html">http://www.diariovasco.com/v/20100717/al-dia-local/detectan-concha-hondarribia-zarautz-20100717.html</a>                                                                                                                                 |
| 12 | 7 | 2010 | 2   | 43.3199 | -1.9869 La Concha                   | Guipuzcoa | MMA                                                                                                                                                                                                                                                                                                                                                     |
| 13 | 7 | 2010 | 1   | 43.3805 | -1.7937 Hondarribia                 | Guipuzcoa | <a href="http://www.diariovasco.com/v/20100717/al-dia-local/detectan-concha-hondarribia-zarautz-20100717.html">http://www.diariovasco.com/v/20100717/al-dia-local/detectan-concha-hondarribia-zarautz-20100717.html</a>                                                                                                                                 |
| 13 | 7 | 2010 | 2   | 43.3805 | -1.7937 Hondarribia                 | Guipuzcoa | MMA                                                                                                                                                                                                                                                                                                                                                     |
| 13 | 7 | 2010 | 1   | 43.2878 | -2.1707 Zarautz                     | Guipuzcoa | <a href="http://www.diariovasco.com/v/20100717/al-dia-local/detectan-concha-hondarribia-zarautz-20100717.html">http://www.diariovasco.com/v/20100717/al-dia-local/detectan-concha-hondarribia-zarautz-20100717.html</a>                                                                                                                                 |
| 14 | 7 | 2010 | 1   | 43.3010 | -2.2616 Zumaya                      | Guipuzcoa | MMA                                                                                                                                                                                                                                                                                                                                                     |
| 15 | 7 | 2010 | 3   | 43.3805 | -1.7937 Hondarribia                 | Guipuzcoa | <a href="http://www.diariovasco.com/v/20100717/al-dia-local/detectan-concha-hondarribia-zarautz-20100717.html">http://www.diariovasco.com/v/20100717/al-dia-local/detectan-concha-hondarribia-zarautz-20100717.html</a>                                                                                                                                 |
| 15 | 7 | 2010 | 3   | 43.3805 | -1.7937 Hondarribia                 | Guipuzcoa | MMA                                                                                                                                                                                                                                                                                                                                                     |
| 15 | 7 | 2010 | 3   | 43.3015 | -2.2018 Malkorbe, Getaria           | Guipuzcoa | MMA                                                                                                                                                                                                                                                                                                                                                     |
| 17 | 7 | 2010 | 2   | 43.3010 | -2.2616 Zumaya                      | Guipuzcoa | MMA                                                                                                                                                                                                                                                                                                                                                     |
| 18 | 7 | 2010 | 1   | 43.4223 | -2.7129 Bermeo                      | Vizcaya   | MMA                                                                                                                                                                                                                                                                                                                                                     |
| 20 | 7 | 2010 | Nan | 43.3001 | -2.3522 Deba, Deba                  | Guipuzcoa | MMA                                                                                                                                                                                                                                                                                                                                                     |
| 20 | 7 | 2010 | Nan | 43.3010 | -2.2616 Zumaya                      | Guipuzcoa | MMA                                                                                                                                                                                                                                                                                                                                                     |
| 20 | 7 | 2010 | Nan | 43.2902 | -2.1289 La Antilla, Orio            | Guipuzcoa | MMA                                                                                                                                                                                                                                                                                                                                                     |
| 20 | 7 | 2010 | 4   | 43.3199 | -1.9869 La Concha                   | Guipuzcoa | MMA                                                                                                                                                                                                                                                                                                                                                     |
| 20 | 7 | 2010 | Nan | 43.3205 | -2.0003 San Sebastián               | Guipuzcoa | MMA                                                                                                                                                                                                                                                                                                                                                     |
| 20 | 7 | 2010 | Nan | 43.3015 | -2.2018 Malkorbe Getaria            | Guipuzcoa | MMA                                                                                                                                                                                                                                                                                                                                                     |
| 20 | 7 | 2010 | 1   | 43.3113 | -2.3799 Mutriku                     | Guipuzcoa | MMA                                                                                                                                                                                                                                                                                                                                                     |
| 20 | 7 | 2010 | Nan | 43.3191 | -2.0020 Ondarreta                   | Guipuzcoa | MMA                                                                                                                                                                                                                                                                                                                                                     |
| 20 | 7 | 2010 | Nan | 43.2878 | -2.1707 Zarautz                     | Guipuzcoa | MMA                                                                                                                                                                                                                                                                                                                                                     |
| 21 | 7 | 2010 | 1   | 38.5338 | -0.1297 Benidorm                    | Alicante  | MMA                                                                                                                                                                                                                                                                                                                                                     |
| 21 | 7 | 2010 | 1   | 43.4651 | -3.7264 Loreda                      | Cantabria | MMA                                                                                                                                                                                                                                                                                                                                                     |
| 23 | 7 | 2010 | 4   | 43.3001 | -2.3522 Deba, Deba                  | Guipuzcoa | MMA                                                                                                                                                                                                                                                                                                                                                     |
| 23 | 7 | 2010 | 1   | 43.2902 | -2.1289 La Antilla, Orio            | Guipuzcoa | MMA                                                                                                                                                                                                                                                                                                                                                     |
| 23 | 7 | 2010 | 1   | 43.5074 | -3.5786 Arnuelo                     | Guipuzcoa | MMA                                                                                                                                                                                                                                                                                                                                                     |
| 23 | 7 | 2010 | 2   | 43.4782 | -3.6893 Langre 1                    | Cantabria | MMA                                                                                                                                                                                                                                                                                                                                                     |
| 23 | 7 | 2010 | 1   | 43.4651 | -3.7264 Loreda                      | Cantabria | MMA                                                                                                                                                                                                                                                                                                                                                     |
| 23 | 7 | 2010 | 5   | 43.3092 | -2.3801 Port of Mutriku             | Guipuzcoa | MMA                                                                                                                                                                                                                                                                                                                                                     |
| 24 | 7 | 2010 | 5   | 43.3010 | -2.2616 Zumaya                      | Guipuzcoa | MMA                                                                                                                                                                                                                                                                                                                                                     |
| 24 | 7 | 2010 | 1   | 38.7096 | 0.1681 Benitachell                  | Alicante  | MMA                                                                                                                                                                                                                                                                                                                                                     |
| 24 | 7 | 2010 | 2   | 43.4943 | -3.5290 Ris, Noja                   | Cantabria | MMA                                                                                                                                                                                                                                                                                                                                                     |
| 25 | 7 | 2010 | 1   | 43.3812 | -3.2138 Castro Urdiales             | Cantabria | MMA                                                                                                                                                                                                                                                                                                                                                     |
| 25 | 7 | 2010 | 1   | 43.4336 | -2.8050 Bakio                       | Vizcaya   | MMA                                                                                                                                                                                                                                                                                                                                                     |
| 26 | 7 | 2010 | 3   | 43.5010 | -3.6130 Bareyo                      | Cantabria | MMA                                                                                                                                                                                                                                                                                                                                                     |
| 26 | 7 | 2010 | 3   | 43.3566 | -3.0219 Arriquinaga                 | Vizcaya   | MMA                                                                                                                                                                                                                                                                                                                                                     |
| 26 | 7 | 2010 | 3   | 43.3902 | -2.9977 Atxabiribil                 | Vizcaya   | MMA                                                                                                                                                                                                                                                                                                                                                     |
| 26 | 7 | 2010 | Nan | 43.3817 | -3.0200 Azkorri, Getxo              | Vizcaya   | MMA                                                                                                                                                                                                                                                                                                                                                     |
| 26 | 7 | 2010 | Nan | 43.4336 | -2.8050 Bakio, Bakio                | Vizcaya   | MMA                                                                                                                                                                                                                                                                                                                                                     |
| 26 | 7 | 2010 | 2   | 43.3914 | -4.2862 Comillas, Comillas          | Cantabria | MMA                                                                                                                                                                                                                                                                                                                                                     |
| 26 | 7 | 2010 | 3   | 43.4703 | -3.7742 El Camello, Santander       | Cantabria | MMA                                                                                                                                                                                                                                                                                                                                                     |
| 26 | 7 | 2010 | 3   | 43.3795 | -3.2006 El Pocillo, Castro Urdiales | Cantabria | MMA                                                                                                                                                                                                                                                                                                                                                     |
| 26 | 7 | 2010 | Nan | 43.4157 | -2.9481 Gortiz, Gortiz              | Vizcaya   | MMA                                                                                                                                                                                                                                                                                                                                                     |
| 26 | 7 | 2010 | Nan | 43.3636 | -2.4999 Isuntza, Lekerio            | Vizcaya   | MMA                                                                                                                                                                                                                                                                                                                                                     |
| 26 | 7 | 2010 | Nan | 43.3010 | -2.2616 Zumaya                      | Guipuzcoa | MMA                                                                                                                                                                                                                                                                                                                                                     |
| 26 | 7 | 2010 | Nan | 43.3643 | -2.4930 Karraspio, Mendexa          | Vizcaya   | MMA                                                                                                                                                                                                                                                                                                                                                     |
| 26 | 7 | 2010 | Nan | 43.3515 | -3.1181 La Arena, Muskiz            | Vizcaya   | MMA                                                                                                                                                                                                                                                                                                                                                     |
| 26 | 7 | 2010 | 3   | 43.3199 | -1.9869 La Concha, San Sebastian    | Guipuzcoa | MMA                                                                                                                                                                                                                                                                                                                                                     |
| 26 | 7 | 2010 | 1   | 43.4372 | -4.0410 La Concha, Suances          | Cantabria | MMA                                                                                                                                                                                                                                                                                                                                                     |
| 26 | 7 | 2010 | Nan | 43.3291 | -1.9770 La Zurriola, Donostia       | Guipuzcoa | MMA                                                                                                                                                                                                                                                                                                                                                     |
| 26 | 7 | 2010 | Nan | 43.4110 | -2.6584 Laga, Ibarrangelu           | Vizcaya   | MMA                                                                                                                                                                                                                                                                                                                                                     |
| 26 | 7 | 2010 | Nan | 43.4089 | -2.6844 Laida, Ibarrangelu          | Vizcaya   | MMA                                                                                                                                                                                                                                                                                                                                                     |
| 26 | 7 | 2010 | 1   | 43.4782 | -3.6893 Ribamontan al Mar           | Cantabria | MMA                                                                                                                                                                                                                                                                                                                                                     |
| 26 | 7 | 2010 | 3   | 43.3965 | -4.2206 Alfoz de Loreda             | Cantabria | MMA                                                                                                                                                                                                                                                                                                                                                     |
| 26 | 7 | 2010 | Nan | 43.3766 | -2.5433 Ogeia, Ispaster             | Vizcaya   | MMA                                                                                                                                                                                                                                                                                                                                                     |
| 26 | 7 | 2010 | Nan | 43.3191 | -2.0020 Ondarreta, Donostia         | Guipuzcoa | MMA                                                                                                                                                                                                                                                                                                                                                     |
| 26 | 7 | 2010 | Nan | 43.4134 | -2.9485 Plentzia, Plentzia          | Vizcaya   | MMA                                                                                                                                                                                                                                                                                                                                                     |
| 26 | 7 | 2010 | 3   | 43.4376 | -3.4514 San Martín, Santoña         | Cantabria | MMA                                                                                                                                                                                                                                                                                                                                                     |
| 26 | 7 | 2010 | 3   | 43.4744 | -3.7794 Sardinero 1, Santander      | Cantabria | MMA                                                                                                                                                                                                                                                                                                                                                     |
| 26 | 7 | 2010 | 1   | 43.4605 | -3.7341 Somo, Ribamontan al Mar     | Cantabria | MMA                                                                                                                                                                                                                                                                                                                                                     |
| 26 | 7 | 2010 | 3   | 43.4406 | -4.0007 Usgo, Miengo                | Cantabria | MMA                                                                                                                                                                                                                                                                                                                                                     |
| 26 | 7 | 2010 | 3   | 43.4777 | -3.8753 Virgen del Mar, Santander   | Cantabria | MMA                                                                                                                                                                                                                                                                                                                                                     |
| 26 | 7 | 2010 | 5   | 43.2878 | -2.1707 Zarautz                     | Guipuzcoa | MMA                                                                                                                                                                                                                                                                                                                                                     |
| 27 | 7 | 2010 | 2   | 43.4234 | -3.4355 La Salve, Laredo            | Cantabria | MMA                                                                                                                                                                                                                                                                                                                                                     |
| 27 | 7 | 2010 | 1   | 43.4864 | -3.7870 Matalaños, Santander        | Cantabria | MMA                                                                                                                                                                                                                                                                                                                                                     |
| 27 | 7 | 2010 | Nan | 43.4943 | -3.5290 Ris, Noja                   | Cantabria | MMA                                                                                                                                                                                                                                                                                                                                                     |
| 27 | 7 | 2010 | 2   | 43.4792 | -3.7826 Castañeda, Santander        | Cantabria | MMA                                                                                                                                                                                                                                                                                                                                                     |
| 28 | 7 | 2010 | 2   | 43.3066 | -2.2062 Getaria                     | Guipuzcoa | MMA                                                                                                                                                                                                                                                                                                                                                     |
| 28 | 7 | 2010 | Nan | 43.4792 | -3.7826 Castañeda, Santander        | Cantabria | MMA                                                                                                                                                                                                                                                                                                                                                     |
| 29 | 7 | 2010 | 3   | 43.5010 | -3.6130 Ajo / Cuberris, Bareyo      | Cantabria | MMA                                                                                                                                                                                                                                                                                                                                                     |
| 29 | 7 | 2010 | 1   | 43.3752 | -3.2107 Brazomar, Castro Urdiales   | Cantabria | MMA                                                                                                                                                                                                                                                                                                                                                     |
| 29 | 7 | 2010 | 1   | 43.4960 | -3.5372 Joyel, Noja                 | Cantabria | MMA                                                                                                                                                                                                                                                                                                                                                     |
| 29 | 7 | 2010 | 1   | 43.4813 | -5.2237 La Isla, Colunga            | Asturias  | MMA                                                                                                                                                                                                                                                                                                                                                     |
| 29 | 7 | 2010 | 1   | 43.5096 | -5.2684 Lastres, Colunga            | Asturias  | MMA                                                                                                                                                                                                                                                                                                                                                     |
| 29 | 7 | 2010 | 2   | 43.3873 | -3.2240 Ostende / Urdiales          | Cantabria | MMA                                                                                                                                                                                                                                                                                                                                                     |
| 29 | 7 | 2010 | 1   | 43.5074 | -3.5786 Ria de Isla, Arnuelo        | Cantabria | MMA                                                                                                                                                                                                                                                                                                                                                     |
| 29 | 7 | 2010 | 1   | 43.4943 | -3.5290 Ris, Noja                   | Cantabria | MMA                                                                                                                                                                                                                                                                                                                                                     |
| 29 | 7 | 2010 | 2   | 43.5378 | -5.3802 Rodiles, Villaviciosa       | Asturias  | MMA                                                                                                                                                                                                                                                                                                                                                     |
| 29 | 7 | 2010 | Nan | 43.4169 | -3.3317 Sonabia, Castro Urdiales    | Cantabria | MMA                                                                                                                                                                                                                                                                                                                                                     |
| 29 | 7 | 2010 | 1   | 43.4178 | -4.7409 Toró, Llanes                | Asturias  | MMA                                                                                                                                                                                                                                                                                                                                                     |
| 30 | 7 | 2010 | 2   | 43.4378 | -4.8248 Barro, Llanes               | Asturias  | MMA                                                                                                                                                                                                                                                                                                                                                     |
| 30 | 7 | 2010 | 2   | 43.4368 | -4.8099 Borizú, Llanes              | Asturias  | MMA                                                                                                                                                                                                                                                                                                                                                     |
| 30 | 7 | 2010 | Nan | 43.4740 | -3.9104 Covachos, Bezana            | Cantabria | MMA                                                                                                                                                                                                                                                                                                                                                     |
| 30 | 7 | 2010 | Nan | 43.4703 | -3.7742 El Camello, Santander       | Cantabria | MMA                                                                                                                                                                                                                                                                                                                                                     |
| 30 | 7 | 2010 | Nan | 43.3795 | -3.2006 El Pocillo, Castro Urdiales | Cantabria | MMA                                                                                                                                                                                                                                                                                                                                                     |
| 30 | 7 | 2010 | Nan | 43.3931 | -3.2114 El Rompeolas                | Cantabria | MMA                                                                                                                                                                                                                                                                                                                                                     |
| 30 | 7 | 2010 | Nan | 43.5074 | -3.5786 Isla, Arnuelo               | Cantabria | MMA                                                                                                                                                                                                                                                                                                                                                     |
| 30 | 7 | 2010 | Nan | 43.4726 | -3.7787 La Concha, Santander        | Cantabria | MMA                                                                                                                                                                                                                                                                                                                                                     |
| 30 | 7 | 2010 | 1   | 43.3959 | -4.5732 La Franca, Ribadeva         | Asturias  | MMA                                                                                                                                                                                                                                                                                                                                                     |
| 30 | 7 | 2010 | 2   | 43.4234 | -3.4355 La Salvé, Laredo            | Cantabria | MMA                                                                                                                                                                                                                                                                                                                                                     |

|    |   |      |     |         |                                    |           |     |
|----|---|------|-----|---------|------------------------------------|-----------|-----|
| 30 | 7 | 2010 | Nan | 43.4782 | -3.6893 Ribamontan al Mar          | Cantabria | MMA |
| 30 | 7 | 2010 | Nan | 43.4651 | -3.7264 Loredo, Ribamontan al Mar  | Cantabria | MMA |
| 30 | 7 | 2010 | Nan | 43.4667 | -3.7690 Los Bikinis, Santander     | Cantabria | MMA |
| 30 | 7 | 2010 | Nan | 43.4641 | -3.7781 Los Peligros, Santander    | Cantabria | MMA |
| 30 | 7 | 2010 | Nan | 43.4667 | -3.7740 Magdalena, Santander       | Cantabria | MMA |
| 30 | 7 | 2010 | Nan | 43.4864 | -3.7870 Matalañas, Santander       | Cantabria | MMA |
| 30 | 7 | 2010 | Nan | 43.3873 | -3.2240 Ostende / Urdiales         | Cantabria | MMA |
| 30 | 7 | 2010 | Nan | 43.3974 | -4.3282 Oyambre, Valdaliga         | Cantabria | MMA |
| 30 | 7 | 2010 | Nan | 43.4749 | -3.7824 Piquo, Santander           | Cantabria | MMA |
| 30 | 7 | 2010 | Nan | 43.4943 | -3.5290 Ris, Noja                  | Cantabria | MMA |
| 30 | 7 | 2010 | Nan | 43.4745 | -3.8910 San Juan de la Canal       | Cantabria | MMA |
| 30 | 7 | 2010 | 2   | 43.4338 | -4.7889 San Martín, Llanes         | Asturias  | MMA |
| 30 | 7 | 2010 | Nan | 43.4744 | -3.7794 Sardinero 1, Santander     | Cantabria | MMA |
| 30 | 7 | 2010 | Nan | 43.4605 | -3.7341 Somo, Ribamontan al Mar    | Cantabria | MMA |
| 30 | 7 | 2010 | 2   | 43.4423 | -4.8372 Toranda, Llanes            | Asturias  | MMA |
| 30 | 7 | 2010 | Nan | 43.4768 | -3.4768 Tregandín, Noja            | Cantabria | MMA |
| 31 | 7 | 2010 | Nan | 43.4573 | -3.9623 Canallave, Piélagos        | Cantabria | MMA |
| 31 | 7 | 2010 | 1   | 40.4056 | -3.2659 Cerdigo, Castro Urdiales   | Cantabria | MMA |
| 31 | 7 | 2010 | Nan | 43.4703 | -3.7742 El Camello, Santander      | Cantabria | MMA |
| 31 | 7 | 2010 | Nan | 43.4601 | -3.7591 El Puntal, Santander       | Cantabria | MMA |
| 31 | 7 | 2010 | Nan | 43.4989 | -3.5401 El Sable, Arnuelo          | Cantabria | MMA |
| 31 | 7 | 2010 | 2   | 43.4981 | -3.5401 Estaño, Gijón              | Asturias  | MMA |
| 31 | 7 | 2010 | 5   | 43.3805 | -1.7937 Hondarribia                | Guipuzcoa | MMA |
| 31 | 7 | 2010 | Nan | 43.4726 | -3.7787 La Concha, Santander       | Cantabria | MMA |
| 31 | 7 | 2010 | 1   | 43.4785 | -5.2122 La Espasa, Caravia         | Asturias  | MMA |
| 31 | 7 | 2010 | 1   | 43.4813 | -5.2237 La Isla, Colunga           | Asturias  | MMA |
| 31 | 7 | 2010 | Nan | 43.4234 | -3.4355 La Salve, Laredo           | Cantabria | MMA |
| 31 | 7 | 2010 | 1   | 43.4136 | -3.3697 Liendo, Liendo             | Cantabria | MMA |
| 31 | 7 | 2010 | Nan | 43.4667 | -3.7690 Los Bikinis, Santander     | Cantabria | MMA |
| 31 | 7 | 2010 | 2   | 43.4769 | -5.1775 Morris, Caravia            | Asturias  | MMA |
| 31 | 7 | 2010 | 1   | 43.5495 | -5.5980 Nora, Villaviciosa         | Asturias  | MMA |
| 31 | 7 | 2010 | Nan | 43.4075 | -3.3194 Oriñón, Castro Urdiales    | Cantabria | MMA |
| 31 | 7 | 2010 | Nan | 43.3974 | -4.3282 Oyambre, Valdaliga         | Cantabria | MMA |
| 31 | 7 | 2010 | 1   | 43.5378 | -5.3802 Rodiles, Villaviciosa      | Asturias  | MMA |
| 31 | 7 | 2010 | Nan | 43.4376 | -3.4514 San Martín, Santoña        | Cantabria | MMA |
| 31 | 7 | 2010 | Nan | 43.4744 | -3.7794 Sardinero 1, Santander     | Cantabria | MMA |
| 31 | 7 | 2010 | Nan | 43.4605 | -3.7341 Somo, Ribamontan al Mar    | Cantabria | MMA |
| 31 | 7 | 2010 | Nan | 43.4777 | -3.8753 Virgen del Mar, Santander  | Cantabria | MMA |
| 1  | 8 | 2010 | Nan | 43.4740 | -3.9104 Covachos, Bezana           | Cantabria | MMA |
| 1  | 8 | 2010 | Nan | 43.4703 | -3.7742 El Camello, Santander      | Cantabria | MMA |
| 1  | 8 | 2010 | Nan | 43.4601 | -3.7591 El Puntal                  | Cantabria | MMA |
| 1  | 8 | 2010 | Nan | 43.3864 | -4.3889 San Vicente de la Barquera | Cantabria | MMA |
| 1  | 8 | 2010 | 1   | 43.4731 | -3.7558 Isla Mouro / Cabo de Lata  | Cantabria | MMA |
| 1  | 8 | 2010 | Nan | 43.5074 | -3.5786 La Arena, Arnuelo          | Cantabria | MMA |
| 1  | 8 | 2010 | Nan | 43.4726 | -3.7787 La Concha, Santander       | Cantabria | MMA |
| 1  | 8 | 2010 | Nan | 43.4234 | -3.4355 La Salve, Laredo           | Cantabria | MMA |
| 1  | 8 | 2010 | Nan | 43.4782 | -3.6893 Ribamontan al Mar          | Cantabria | MMA |
| 1  | 8 | 2010 | Nan | 43.4651 | -3.7264 Loredo, Ribamontan al Mar  | Cantabria | MMA |
| 1  | 8 | 2010 | Nan | 43.4667 | -3.7740 Magdalena, Santander       | Cantabria | MMA |
| 1  | 8 | 2010 | Nan | 43.4075 | -3.3194 Oriñón, Castro Urdiales    | Cantabria | MMA |
| 1  | 8 | 2010 | Nan | 43.3873 | -3.2240 Ostende / Urdiales         | Cantabria | MMA |
| 1  | 8 | 2010 | Nan | 43.3974 | -4.3282 Oyambre, Valdaliga         | Cantabria | MMA |
| 1  | 8 | 2010 | Nan | 43.4744 | -3.7794 Sardinero 1, Santander     | Cantabria | MMA |
| 1  | 8 | 2010 | Nan | 43.4605 | -3.7341 Somo, Ribamontan al Mar    | Cantabria | MMA |
| 1  | 8 | 2010 | Nan | 43.4280 | -4.0950 Taque / El Sable, Suances  | Cantabria | MMA |
| 2  | 8 | 2010 | 2   | 43.3812 | -3.2138 Bahía, Castro Urdiales     | Cantabria | MMA |
| 2  | 8 | 2010 | 1   | 43.5532 | -6.3696 Cadavedo, Valdés           | Asturias  | MMA |
| 2  | 8 | 2010 | 2   | 43.4573 | -3.9623 Canallave, Piélagos        | Cantabria | MMA |
| 2  | 8 | 2010 | 1   | 43.4703 | -3.7742 El Camello, Santander      | Cantabria | MMA |
| 2  | 8 | 2010 | 1   | 43.4834 | -3.8348 La Maruca, Santander       | Cantabria | MMA |
| 2  | 8 | 2010 | Nan | 43.4234 | -3.4355 La Salve, Laredo           | Cantabria | MMA |
| 2  | 8 | 2010 | 1   | 43.4667 | -3.7690 Los Bikinis, Santander     | Cantabria | MMA |
| 2  | 8 | 2010 | 1   | 43.4391 | -4.0484 Los Locos, Suances         | Cantabria | MMA |
| 2  | 8 | 2010 | 1   | 43.4641 | -3.7781 Los Peligros, Santander    | Cantabria | MMA |
| 2  | 8 | 2010 | 1   | 43.4667 | -3.7740 Magdalena, Santander       | Cantabria | MMA |
| 2  | 8 | 2010 | 2   | 43.3873 | -3.2240 Ostende / Urdiales         | Cantabria | MMA |
| 2  | 8 | 2010 | 1   | 43.3854 | -3.2142 Peñón de Santa Ana         | Cantabria | MMA |
| 2  | 8 | 2010 | 2   | 43.4943 | -3.5290 Ris, Noja                  | Cantabria | MMA |
| 3  | 8 | 2010 | 3   | 43.5010 | -3.6130 Ajo / Cuberris, Bareyo     | Cantabria | MMA |
| 3  | 8 | 2010 | 3   | 43.3812 | -3.2138 Bahía, Castro Urdiales     | Cantabria | MMA |
| 3  | 8 | 2010 | 4   | 43.4336 | -2.8050 Bakio                      | Vizcaya   | MMA |
| 3  | 8 | 2010 | Nan | 43.4713 | -3.4631 Berria, Santoña            | Cantabria | MMA |
| 3  | 8 | 2010 | 2   | 43.3914 | -4.2862 Comillas, Comillas         | Cantabria | MMA |
| 3  | 8 | 2010 | 2   | 43.4703 | -3.7742 El Camello, Santander      | Cantabria | MMA |
| 3  | 8 | 2010 | 1   | 43.4601 | -3.7591 Ribamontan al Mar          | Cantabria | MMA |
| 3  | 8 | 2010 | 2   | 43.4744 | -3.7794 El Sardinero 1, Santander  | Cantabria | MMA |
| 3  | 8 | 2010 | Nan | 43.4234 | -3.4355 La Salve, Laredo           | Cantabria | MMA |
| 3  | 8 | 2010 | 1   | 43.4860 | -5.1451 La Vega, Ribadesella       | Asturias  | MMA |
| 3  | 8 | 2010 | 4   | 43.4782 | -3.6893 Langre, Ribamontan al Mar  | Cantabria | MMA |
| 3  | 8 | 2010 | 4   | 43.4651 | -3.7264 Loredo, Ribamontan al Mar  | Cantabria | MMA |
| 3  | 8 | 2010 | 2   | 43.4391 | -4.0484 Los Locos, Suances         | Cantabria | MMA |
| 3  | 8 | 2010 | 4   | 43.3965 | -4.2206 Luaña / Cobrecos           | Cantabria | MMA |
| 3  | 8 | 2010 | 2   | 43.4864 | -3.7870 Matalañas, Santander       | Cantabria | MMA |
| 3  | 8 | 2010 | 1   | 43.3941 | -4.3803 San Vicente de la Barquera | Cantabria | MMA |
| 3  | 8 | 2010 | 3   | 43.5453 | -5.4940 Merón, Villaviciosa        | Asturias  | MMA |
| 3  | 8 | 2010 | 4   | 43.3873 | -3.2240 Ostende / Urdiales         | Cantabria | MMA |
| 3  | 8 | 2010 | 2   | 43.4282 | -4.0963 Santillana del Mar         | Cantabria | MMA |
| 3  | 8 | 2010 | 4   | 43.4605 | -3.7341 Somo, Ribamontan al Mar    | Cantabria | MMA |
| 3  | 8 | 2010 | 4   | 43.4280 | -4.0950 Taque / El Sable, Suances  | Cantabria | MMA |
| 3  | 8 | 2010 | 2   | 43.4571 | -3.9730 Valdearenas, Piélagos      | Cantabria | MMA |
| 3  | 8 | 2010 | 4   | 43.3994 | -4.3668 San Vicente de la Barquera | Cantabria | MMA |
| 3  | 8 | 2010 | 2   | 43.4777 | -3.8753 Virgen del Mar, Santander  | Cantabria | MMA |
| 3  | 8 | 2010 | 1   | 43.3048 | -2.2516 Zumalía                    | Guipuzcoa | MMA |
| 4  | 8 | 2010 | 2   | 43.4132 | -4.7067 Andrín, Llanes             | Asturias  | MMA |
| 4  | 8 | 2010 | 2   | 43.4573 | -3.9623 Canallave, Piélagos        | Cantabria | MMA |
| 4  | 8 | 2010 | Nan | 43.4740 | -3.9104 Covachos, Bezana           | Cantabria | MMA |
| 4  | 8 | 2010 | 1   | 43.4601 | -3.7591 Ribamontan al Mar          | Cantabria | MMA |
| 4  | 8 | 2010 | Nan | 43.3948 | -4.4693 El Sable, Arnuelo          | Cantabria | MMA |
| 4  | 8 | 2010 | 2   | 43.4821 | -3.6782 Galizano                   | Cantabria | MMA |
| 4  | 8 | 2010 | 1   | 43.3452 | -3.0175 Getxo                      | Vizcaya   | MMA |
| 4  | 8 | 2010 | Nan | 43.4726 | -3.7787 La Concha, Santander       | Cantabria | MMA |
| 4  | 8 | 2010 | 4   | 43.4782 | -3.6893 Langre, Ribamontan al Mar  | Cantabria | MMA |
| 4  | 8 | 2010 | 4   | 43.4651 | -3.7264 Loredo, Ribamontan al Mar  | Cantabria | MMA |
| 4  | 8 | 2010 | 4   | 43.4391 | -4.0484 Los Locos, Suances         | Cantabria | MMA |
| 4  | 8 | 2010 | Nan | 43.3965 | -4.2206 Luaña / Cobrecos           | Cantabria | MMA |
| 4  | 8 | 2010 | 3   | 43.5453 | -5.4940 Merón, Villaviciosa        | Asturias  | MMA |
| 4  | 8 | 2010 | 3   | 43.3873 | -3.2240 Ostende / Urdiales         | Cantabria | MMA |
| 4  | 8 | 2010 | 1   | 43.4223 | -4.7495 Sablón, Llanes             | Asturias  | MMA |
| 4  | 8 | 2010 | 2   | 43.4605 | -3.7341 Somo, Ribamontan al Mar    | Cantabria | MMA |
| 4  | 8 | 2010 | 4   | 43.4280 | -4.0950 Taque / El Sable, Suances  | Cantabria | MMA |
| 4  | 8 | 2010 | 1   | 43.4455 | -4.8522 Torimbia, Llanes           | Asturias  | MMA |
| 4  | 8 | 2010 | 2   | 43.4571 | -3.9730 Valdearenas, Piélagos      | Cantabria | MMA |
| 4  | 8 | 2010 | 3   | 43.4035 | -4.6545 Vidiago, Llanes            | Asturias  | MMA |
| 4  | 8 | 2010 | 2   | 43.4777 | -3.8753 Virgen del Mar, Santander  | Cantabria | MMA |
| 5  | 8 | 2010 | 1   | 43.5010 | -3.6130 Ajo / Cuberris, Bareyo     | Cantabria | MMA |
| 5  | 8 | 2010 | 2   | 43.6081 | -7.3017 Arealonga, Foz             | Lugo      | MMA |
| 5  | 8 | 2010 | 1   | 43.3812 | -3.2138 Bahía, Castro Urdiales     | Cantabria | MMA |
| 5  | 8 | 2010 | 1   | 43.4378 | -4.8248 Barro, Llanes              | Asturias  | MMA |

|    |   |      |     |         |                                     |           |     |
|----|---|------|-----|---------|-------------------------------------|-----------|-----|
| 5  | 8 | 2010 | 1   | 43.3752 | -3.2107 Brazomar, Castro Urdiales   | Cantabria | MMA |
| 5  | 8 | 2010 | 2   | 43.4573 | -3.9623 Canallave, Pielagos         | Cantabria | MMA |
| 5  | 8 | 2010 | 2   | 43.4703 | -3.7742 El Camello, Santander       | Cantabria | MMA |
| 5  | 8 | 2010 | 4   | 43.4601 | -3.7591 Ribamontan al Mar           | Cantabria | MMA |
| 5  | 8 | 2010 | Nan | 43.4989 | -3.5401 El Sable, Arnuelo           | Cantabria | MMA |
| 5  | 8 | 2010 | 2   | 43.5477 | -5.5294 España, Villaviciosa        | Asturias  | MMA |
| 5  | 8 | 2010 | 3   | 43.4821 | -3.6782 Galizano                    | Cantabria | MMA |
| 5  | 8 | 2010 | 1   | 43.5074 | -3.5786 La Arena, Arnuelo           | Cantabria | MMA |
| 5  | 8 | 2010 | 1   | 43.4726 | -3.7787 La Concha, Santander        | Cantabria | MMA |
| 5  | 8 | 2010 | 1   | 43.4372 | -4.0410 La Concha, Suances          | Cantabria | MMA |
| 5  | 8 | 2010 | 4   | 43.4834 | -3.8348 La Maruca, Santander        | Cantabria | MMA |
| 5  | 8 | 2010 | 2   | 43.4234 | -3.4355 La Salve, Laredo            | Cantabria | MMA |
| 5  | 8 | 2010 | 2   | 43.4860 | -5.1451 La Vega, Ribadesella        | Asturias  | MMA |
| 5  | 8 | 2010 | 2   | 43.4782 | -3.6893 Langre, Ribamontan al Mar   | Cantabria | MMA |
| 5  | 8 | 2010 | 1   | 43.4651 | -3.7264 Loredo, Ribamontan al Mar   | Cantabria | MMA |
| 5  | 8 | 2010 | 1   | 43.6185 | -5.7854 Luanco, Gozón               | Asturias  | MMA |
| 5  | 8 | 2010 | 2   | 43.3965 | -4.2206 Luaña / Cobrecos            | Cantabria | MMA |
| 5  | 8 | 2010 | Nan | 43.3941 | -4.3803 San Vicente de la Barquera  | Cantabria | MMA |
| 5  | 8 | 2010 | 2   | 43.3974 | -4.3282 Oyambre, Valdaliaga         | Cantabria | MMA |
| 5  | 8 | 2010 | 1   | 43.6626 | -7.3518 Portocelo/Urbana, Burela    | Lugo      | MMA |
| 5  | 8 | 2010 | 2   | 43.5735 | -7.2455 Rapadoira, Foz              | Lugo      | MMA |
| 5  | 8 | 2010 | 2   | 43.4338 | -4.7889 San Martín, Llanes          | Asturias  | MMA |
| 5  | 8 | 2010 | 1   | 43.4731 | -3.7297 Ribamontan al Mar           | Cantabria | MMA |
| 5  | 8 | 2010 | 2   | 43.4605 | -3.7341 Somo, Ribamontan al Mar     | Cantabria | MMA |
| 5  | 8 | 2010 | 2   | 43.4280 | -4.0950 Tagle / El Sable, Suances   | Cantabria | MMA |
| 5  | 8 | 2010 | 2   | 43.4423 | -4.8372 Toranda, Llanes             | Asturias  | MMA |
| 5  | 8 | 2010 | 5   | 43.3947 | -4.4872 Val de San Vicente, Pechón  | Cantabria | MMA |
| 5  | 8 | 2010 | 4   | 43.4571 | -3.9730 Valdearenas, Piélagos       | Cantabria | MMA |
| 5  | 8 | 2010 | 4   | 43.4777 | -3.8753 Virgen del Mar, Santander   | Cantabria | MMA |
| 6  | 8 | 2010 | Nan | 43.4748 | -3.9140 Arnia, Piélagos             | Cantabria | MMA |
| 6  | 8 | 2010 | 1   | 43.6324 | -5.8090 Bañugues, Gozón             | Asturias  | MMA |
| 6  | 8 | 2010 | Nan | 43.4703 | -3.7742 El Camello, Santander       | Cantabria | MMA |
| 6  | 8 | 2010 | Nan | 43.4601 | -3.7591 Ribamontan al Mar           | Cantabria | MMA |
| 6  | 8 | 2010 | Nan | 43.3864 | -4.3889 San Vicente de la Barquera  | Cantabria | MMA |
| 6  | 8 | 2010 | 3   | 43.5049 | -3.6450 Santoña                     | Cantabria | MMA |
| 6  | 8 | 2010 | 3   | 43.4731 | -3.7558 Isla Mouro / Cabo de Lata   | Cantabria | MMA |
| 6  | 8 | 2010 | 1   | 43.4649 | -5.0543 La Atalaya, Ribadesella     | Asturias  | MMA |
| 6  | 8 | 2010 | Nan | 43.4726 | -3.7787 La Concha, Santander        | Cantabria | MMA |
| 6  | 8 | 2010 | Nan | 43.4320 | -4.0341 La Ribera, Suances          | Cantabria | MMA |
| 6  | 8 | 2010 | Nan | 43.4234 | -3.4355 La Salve, Laredo            | Cantabria | MMA |
| 6  | 8 | 2010 | Nan | 43.4782 | -3.6893 Ribamontan al Mar           | Cantabria | MMA |
| 6  | 8 | 2010 | Nan | 43.4667 | -3.7690 Los Bikinis, Santander      | Cantabria | MMA |
| 6  | 8 | 2010 | Nan | 43.3965 | -4.2206 Luaña / Cobrecos            | Cantabria | MMA |
| 6  | 8 | 2010 | Nan | 43.4667 | -3.7740 Magdalena, Santander        | Cantabria | MMA |
| 6  | 8 | 2010 | Nan | 43.4864 | -3.7870 Matalaños, Santander        | Cantabria | MMA |
| 6  | 8 | 2010 | Nan | 43.4075 | -3.3194 Oriñón, Castro Urdiales     | Cantabria | MMA |
| 6  | 8 | 2010 | Nan | 43.3974 | -4.3282 Oyambre, Valdaliaga         | Cantabria | MMA |
| 6  | 8 | 2010 | Nan | 43.4749 | -3.7824 Piquito, Santander          | Cantabria | MMA |
| 6  | 8 | 2010 | Nan | 43.4744 | -3.7794 Sardinero 1, Santander      | Cantabria | MMA |
| 6  | 8 | 2010 | Nan | 43.4792 | -3.7826 Sardinero 2 / Castañeda     | Cantabria | MMA |
| 7  | 8 | 2010 | 1   | 43.4748 | -3.9140 Arnia, Piélagos             | Cantabria | MMA |
| 7  | 8 | 2010 | Nan | 43.3914 | -4.2862 Comillas, Comillas          | Cantabria | MMA |
| 7  | 8 | 2010 | 3   | 43.3001 | -2.3522 Deba                        | Guipuzcoa | MMA |
| 7  | 8 | 2010 | 2   | 43.4703 | -3.7742 El Camello, Santander       | Cantabria | MMA |
| 7  | 8 | 2010 | 3   | 43.3364 | -2.0850 Guipuzcoa                   | Guipuzcoa | MMA |
| 7  | 8 | 2010 | 2   | 43.4731 | -3.7558 Isla Mouro / Cabo de Lata   | Cantabria | MMA |
| 7  | 8 | 2010 | 2   | 43.4234 | -3.4355 La Salve, Laredo            | Cantabria | MMA |
| 7  | 8 | 2010 | 1   | 43.4782 | -3.6893 Langre, Ribamontan al Mar   | Cantabria | MMA |
| 7  | 8 | 2010 | 1   | 43.4651 | -3.7264 Loredo, Ribamontan al Mar   | Cantabria | MMA |
| 7  | 8 | 2010 | Nan | 43.3965 | -4.2206 Luaña / Cobrecos            | Cantabria | MMA |
| 7  | 8 | 2010 | 2   | 43.4667 | -3.7740 Magdalena, Santander        | Cantabria | MMA |
| 7  | 8 | 2010 | 3   | 43.3015 | -2.2018 Malkorbe, Getaria           | Guipuzcoa | MMA |
| 7  | 8 | 2010 | 1   | 43.3654 | -3.1925 Castro Urdiales             | Cantabria | MMA |
| 7  | 8 | 2010 | 1   | 43.4075 | -3.3194 Oriñón, Castro Urdiales     | Cantabria | MMA |
| 7  | 8 | 2010 | 1   | 43.3974 | -4.3282 Oyambre, Valdaliaga         | Cantabria | MMA |
| 7  | 8 | 2010 | 1   | 43.4749 | -3.7824 Piquito, Santander          | Cantabria | MMA |
| 7  | 8 | 2010 | 1   | 43.4745 | -3.8910 San Juan de la Canal        | Cantabria | MMA |
| 7  | 8 | 2010 | Nan | 43.4792 | -3.7826 Sardinero 2                 | Cantabria | MMA |
| 7  | 8 | 2010 | 1   | 43.4605 | -3.7341 Somo, Ribamontan al Mar     | Cantabria | MMA |
| 7  | 8 | 2010 | 1   | 43.4169 | -3.3317 Sonabia, Castro Urdiales    | Cantabria | MMA |
| 8  | 8 | 2010 | 1   | 43.4713 | -3.4631 Berria, Santoña             | Cantabria | MMA |
| 8  | 8 | 2010 | 1   | 43.3001 | -2.3522 Deba                        | Guipuzcoa | MMA |
| 8  | 8 | 2010 | 2   | 43.5049 | -3.5449 El Ardanal, Arnuelo         | Cantabria | MMA |
| 8  | 8 | 2010 | 1   | 43.4703 | -3.7742 El Camello, Santander       | Cantabria | MMA |
| 8  | 8 | 2010 | 2   | 43.4989 | -3.5401 El Sable, Arnuelo           | Cantabria | MMA |
| 8  | 8 | 2010 | 1   | 43.3066 | -2.2062 Getaria                     | Guipuzcoa | MMA |
| 8  | 8 | 2010 | 1   | 43.5074 | -3.5786 La Arena, Arnuelo           | Cantabria | MMA |
| 8  | 8 | 2010 | 1   | 43.4234 | -3.4355 La Salve, Laredo            | Cantabria | MMA |
| 8  | 8 | 2010 | 1   | 43.4667 | -3.7690 Los Bikinis, Santander      | Cantabria | MMA |
| 8  | 8 | 2010 | 1   | 43.4641 | -3.7781 Los Peligros, Santander     | Cantabria | MMA |
| 8  | 8 | 2010 | 1   | 43.4667 | -3.7740 Magdalena, Santander        | Cantabria | MMA |
| 8  | 8 | 2010 | 1   | 43.4444 | -3.9941 Miengo                      | Cantabria | MMA |
| 8  | 8 | 2010 | 1   | 43.3873 | -3.2240 Ostende / Urdiales          | Cantabria | MMA |
| 8  | 8 | 2010 | 1   | 43.3974 | -4.3282 Oyambre, Valdaliaga         | Cantabria | MMA |
| 8  | 8 | 2010 | 2   | 43.4749 | -3.7824 Piquito, Santander          | Cantabria | MMA |
| 8  | 8 | 2010 | 2   | 43.4792 | -3.7826 Sardinero 2                 | Cantabria | MMA |
| 9  | 8 | 2010 | 4   | 43.4039 | -3.3133 Arenillas, Castro Urdiales  | Cantabria | MMA |
| 9  | 8 | 2010 | 1   | 43.4378 | -4.8248 Barro, Llanes               | Asturias  | MMA |
| 9  | 8 | 2010 | 2   | 43.3752 | -3.2107 Brazomar, Castro Urdiales   | Cantabria | MMA |
| 9  | 8 | 2010 | 5   | 43.3293 | -1.9943 Donostia - San Sebastian    | Guipuzcoa | MMA |
| 9  | 8 | 2010 | 4   | 43.4703 | -3.7742 El Camello, Santander       | Cantabria | MMA |
| 9  | 8 | 2010 | 1   | 43.4223 | -4.7495 El Sablón, Llanes           | Asturias  | MMA |
| 9  | 8 | 2010 | 2   | 43.4731 | -3.7558 Isla Mouro / Cabo de Lata   | Cantabria | MMA |
| 9  | 8 | 2010 | 5   | 43.3809 | -2.5250 Ispaster - Lelkeitio        | Vizcaya   | MMA |
| 9  | 8 | 2010 | 2   | 43.4726 | -3.7787 La Concha, Santander        | Cantabria | MMA |
| 9  | 8 | 2010 | 1   | 43.5084 | -5.2595 La Griega, Colunga          | Asturias  | MMA |
| 9  | 8 | 2010 | 3   | 43.4864 | -3.7870 Matalaños, Santander        | Cantabria | MMA |
| 9  | 8 | 2010 | Nan | 43.3941 | -4.3803 Merón                       | Cantabria | MMA |
| 9  | 8 | 2010 | 2   | 43.3654 | -3.1925 Mioño / Dicio               | Cantabria | MMA |
| 9  | 8 | 2010 | 2   | 43.3873 | -3.2240 Ostende / Urdiales          | Cantabria | MMA |
| 9  | 8 | 2010 | 1   | 43.4749 | -3.7824 Piquito, Santander          | Cantabria | MMA |
| 9  | 8 | 2010 | 1   | 43.4745 | -3.8910 San Juan de la Canal        | Cantabria | MMA |
| 9  | 8 | 2010 | 4   | 43.4744 | -3.7794 Sardinero 1, Santander      | Cantabria | MMA |
| 9  | 8 | 2010 | 1   | 43.3994 | -4.3668 Vederna                     | Cantabria | MMA |
| 10 | 8 | 2010 | 2   | 43.5010 | -3.6130 Ajo / Cuberris, Barevo      | Cantabria | MMA |
| 10 | 8 | 2010 | 4   | 43.4039 | -3.3133 Arenillas, Castro Urdiales  | Cantabria | MMA |
| 10 | 8 | 2010 | 1   | 43.4137 | -4.7114 Ballota, Llanes             | Asturias  | MMA |
| 10 | 8 | 2010 | 1   | 43.4378 | -4.8248 Barro, Llanes               | Asturias  | MMA |
| 10 | 8 | 2010 | 4   | 43.4713 | -3.4631 Berria, Santoña             | Cantabria | MMA |
| 10 | 8 | 2010 | 4   | 43.4368 | -4.8099 Borizú, Llanes              | Asturias  | MMA |
| 10 | 8 | 2010 | 3   | 43.3752 | -3.2107 Brazomar, Castro Urdiales   | Cantabria | MMA |
| 10 | 8 | 2010 | 5   | 43.3293 | -1.9943 Donostia - San Sebastian    | Guipuzcoa | MMA |
| 10 | 8 | 2010 | 2   | 43.4015 | -4.3573 El Cabo / Gerra             | Cantabria | MMA |
| 10 | 8 | 2010 | 2   | 43.4703 | -3.7742 El Camello, Santander       | Cantabria | MMA |
| 10 | 8 | 2010 | 2   | 43.3795 | -3.2006 El Pocillo, Castro Urdiales | Cantabria | MMA |
| 10 | 8 | 2010 | 3   | 43.3864 | -4.3889 El Rosal                    | Cantabria | MMA |
| 10 | 8 | 2010 | 1   | 43.4989 | -3.5401 El Sable, Arnuelo           | Cantabria | MMA |
| 10 | 8 | 2010 | 4   | 43.4223 | -4.7495 El Sablón, Llanes           | Asturias  | MMA |



|    |   |      |     |         |                                      |              |     |
|----|---|------|-----|---------|--------------------------------------|--------------|-----|
| 10 | 8 | 2010 | Nan | 43.4821 | -3.6782 Ribamontan al Mar            | Cantabria    | MMA |
| 10 | 8 | 2010 | Nan | 43.3643 | -2.4930 Karraspio, Mendexa           | Cantabria    | MMA |
| 10 | 8 | 2010 | 1   | 43.5074 | -3.5786 La Arena, Arnuelo            | Cantabria    | MMA |
| 10 | 8 | 2010 | 1   | 43.4834 | -3.8348 La Maruca, Santander         | Cantabria    | MMA |
| 10 | 8 | 2010 | Nan | 43.4234 | -3.4355 La Salve, Laredo             | Cantabria    | MMA |
| 10 | 8 | 2010 | 3   | 43.4667 | -3.7690 Los Bikinis, Santander       | Cantabria    | MMA |
| 10 | 8 | 2010 | 2   | 43.4641 | -3.7781 Los Peligros, Santander      | Cantabria    | MMA |
| 10 | 8 | 2010 | 4   | 43.4864 | -3.7870 Mataleñas, Santander         | Cantabria    | MMA |
| 10 | 8 | 2010 | Nan | 43.3517 | -2.4746 Mendexa, Lekeitio            | Vizcaya      | MMA |
| 10 | 8 | 2010 | Nan | 43.3941 | -4.3803 Merón                        | Cantabria    | MMA |
| 10 | 8 | 2010 | 3   | 43.3654 | -3.1925 Mioño / Dícido               | Cantabria    | MMA |
| 10 | 8 | 2010 | 2   | 43.4835 | -3.7843 Molinucos, Santander         | Cantabria    | MMA |
| 10 | 8 | 2010 | 4   | 43.4075 | -3.3194 Oriñón, Castro Urdiales      | Cantabria    | MMA |
| 10 | 8 | 2010 | 2   | 43.3873 | -3.2240 Ostende / Urdiales           | Cantabria    | MMA |
| 10 | 8 | 2010 | 3   | 43.3974 | -4.3282 Oyambre, Valdalliga          | Cantabria    | MMA |
| 10 | 8 | 2010 | 2   | 43.4332 | -4.7854 Póo, Llanes                  | Asturias     | MMA |
| 10 | 8 | 2010 | 2   | 43.5604 | -5.4031 Punta del Olivo / Tazonos    | Asturias     | MMA |
| 10 | 8 | 2010 | 2   | 43.4943 | -3.5290 Ris, Noja                    | Cantabria    | MMA |
| 10 | 8 | 2010 | 4   | 43.3831 | -3.2114 Rompeolas, Castro Urdiales   | Cantabria    | MMA |
| 10 | 8 | 2010 | Nan | 43.4376 | -3.4514 San Martín, Santoña          | Cantabria    | MMA |
| 10 | 8 | 2010 | Nan | 43.4768 | -3.4768 Tregandín, Noja              | Cantabria    | MMA |
| 10 | 8 | 2010 | 3   | 43.4406 | -4.0007 Usgo, Miengo                 | Cantabria    | MMA |
| 10 | 8 | 2010 | Nan | 43.4571 | -3.9730 Valdearenas, Piélagos        | Cantabria    | MMA |
| 11 | 8 | 2010 | 2   | 43.4132 | -4.7067 Andrín, Llanes               | Asturias     | MMA |
| 11 | 8 | 2010 | 1   | 43.4617 | -4.9355 Cuevas del Mar, Llanes       | Asturias     | MMA |
| 11 | 8 | 2010 | 5   | 43.3293 | -1.9943 Donostia - San Sebastian     | Guipuzcoa    | MMA |
| 11 | 8 | 2010 | 2   | 43.4223 | -4.7495 El Sablón, Llanes            | Asturias     | MMA |
| 11 | 8 | 2010 | 2   | 43.4792 | -3.7826 El Sardinero 2               | Cantabria    | MMA |
| 11 | 8 | 2010 | 2   | 43.4197 | -4.7441 Puerto Chicú y Toró          | Asturias     | MMA |
| 11 | 8 | 2010 | 4   | 43.3636 | -2.4999 Isuntza, Lekeitio            | Vizcaya      | MMA |
| 11 | 8 | 2010 | 1   | 43.4860 | -5.1451 La Vega, Ribadesella         | Asturias     | MMA |
| 11 | 8 | 2010 | 2   | 43.4651 | -3.7264 Loredó, Ribamontan al Mar    | Cantabria    | MMA |
| 11 | 8 | 2010 | 2   | 43.4391 | -4.0484 Los Locos, Suances           | Cantabria    | MMA |
| 11 | 8 | 2010 | 2   | 43.4667 | -3.7740 Magdalena, Santander         | Cantabria    | MMA |
| 11 | 8 | 2010 | 1   | 43.3873 | -3.2240 Ostende / Urdiales           | Cantabria    | MMA |
| 11 | 8 | 2010 | 2   | 43.3974 | -4.3282 Oyambre, Valdalliga          | Cantabria    | MMA |
| 11 | 8 | 2010 | 2   | 43.4332 | -4.7854 Póo, Llanes                  | Asturias     | MMA |
| 11 | 8 | 2010 | 1   | 43.4035 | -4.6545 Vidiago, Llanes              | Asturias     | MMA |
| 12 | 8 | 2010 | Nan | 27.7895 | -15.7256 Amadores, Moqán             | Gran Canaria | MMA |
| 12 | 8 | 2010 | Nan | 43.3947 | -4.4872 Amio, Val de San Vicente     | Cantabria    | MMA |
| 12 | 8 | 2010 | Nan | 43.3817 | -3.0200 Azcorri, Getxo               | Vizcaya      | MMA |
| 12 | 8 | 2010 | 2   | 43.4573 | -3.9623 Canallave, Piélagos          | Cantabria    | MMA |
| 12 | 8 | 2010 | 2   | 43.3914 | -4.2862 Comillas, Comillas           | Cantabria    | MMA |
| 12 | 8 | 2010 | 5   | 43.3293 | -1.9943 Donostia - San Sebastian     | Guipuzcoa    | MMA |
| 12 | 8 | 2010 | 1   | 43.4015 | -4.3573 El Cabo / Gerra              | Cantabria    | MMA |
| 12 | 8 | 2010 | 1   | 43.4703 | -3.7742 El Camello, Santander        | Cantabria    | MMA |
| 12 | 8 | 2010 | 3   | 43.4744 | -3.7794 El Sardinero, Santander      | Cantabria    | MMA |
| 12 | 8 | 2010 | 2   | 43.4821 | -3.6782 Ribamontan al Mar            | Cantabria    | MMA |
| 12 | 8 | 2010 | 1   | 43.3941 | -4.3806 La Braña                     | Cantabria    | MMA |
| 12 | 8 | 2010 | 2   | 43.4834 | -3.8348 La Maruca, Santander         | Cantabria    | MMA |
| 12 | 8 | 2010 | Nan | 43.3886 | -4.3914 La Maza                      | Cantabria    | MMA |
| 12 | 8 | 2010 | 1   | 43.4234 | -3.4355 La Salve, Laredo             | Cantabria    | MMA |
| 12 | 8 | 2010 | 2   | 43.4651 | -3.7264 Loredó, Ribamontan al Mar    | Cantabria    | MMA |
| 12 | 8 | 2010 | 2   | 43.4391 | -4.0484 Los Locos, Suances           | Cantabria    | MMA |
| 12 | 8 | 2010 | 3   | 43.4667 | -3.7740 Magdalena, Santander         | Cantabria    | MMA |
| 12 | 8 | 2010 | 3   | 43.4864 | -3.7870 Mataleñas, Santander         | Cantabria    | MMA |
| 12 | 8 | 2010 | 1   | 43.3941 | -4.3803 Merón                        | Cantabria    | MMA |
| 12 | 8 | 2010 | 3   | 43.4605 | -3.7341 Somo, Ribamontan al Mar      | Cantabria    | MMA |
| 12 | 8 | 2010 | 3   | 43.4280 | -4.0950 Taqle / El Sable, Suances    | Cantabria    | MMA |
| 12 | 8 | 2010 | 3   | 43.4571 | -3.9730 Valdearenas, Piélagos        | Cantabria    | MMA |
| 12 | 8 | 2010 | 3   | 43.4777 | -3.8753 Virgen del Mar, Santander    | Cantabria    | MMA |
| 13 | 8 | 2010 | 4   | 43.5010 | -3.6130 Ajo / Cuberris, Barevo       | Cantabria    | MMA |
| 13 | 8 | 2010 | 4   | 43.4748 | -3.9140 Arnia, Piélagos              | Cantabria    | MMA |
| 13 | 8 | 2010 | 3   | 43.4577 | -3.8041 Bahía de Santander           | Cantabria    | MMA |
| 13 | 8 | 2010 | 2   | 43.4573 | -3.9623 Canallave, Piélagos          | Cantabria    | MMA |
| 13 | 8 | 2010 | 5   | 43.3293 | -1.9943 Donostia - San Sebastian     | Cantabria    | MMA |
| 13 | 8 | 2010 | 4   | 43.4015 | -4.3573 El Cabo / Gerra              | Cantabria    | MMA |
| 13 | 8 | 2010 | 1   | 43.4744 | -3.7794 El Sardinero, Santander      | Cantabria    | MMA |
| 13 | 8 | 2010 | 1   | 43.4731 | -3.7558 Isla Mouro / Cabo de Lata    | Cantabria    | MMA |
| 13 | 8 | 2010 | 2   | 43.4834 | -3.8348 La Maruca, Santander         | Cantabria    | MMA |
| 13 | 8 | 2010 | 2   | 43.4782 | -3.6893 Lanre, Ribamontan al Mar     | Cantabria    | MMA |
| 13 | 8 | 2010 | 4   | 43.4391 | -4.0484 Los Locos, Suances           | Cantabria    | MMA |
| 13 | 8 | 2010 | 2   | 43.3654 | -3.1925 Mioño / Dícido               | Cantabria    | MMA |
| 13 | 8 | 2010 | 2   | 43.4698 | -3.9326 Portio, Piélagos             | Cantabria    | MMA |
| 13 | 8 | 2010 | 3   | 43.4280 | -4.0950 Taqle / El Sable, Suances    | Cantabria    | MMA |
| 13 | 8 | 2010 | 4   | 43.4571 | -3.9730 Valdearenas, Piélagos        | Cantabria    | MMA |
| 14 | 8 | 2010 | Nan | 43.5010 | -3.6130 Ajo / Cuberris, Barevo       | Cantabria    | MMA |
| 14 | 8 | 2010 | 1   | 43.4341 | -2.8934 Armintza                     | Vizcaya      | MMA |
| 14 | 8 | 2010 | 5   | 43.4577 | -3.8041 Bahía de Santander           | Cantabria    | MMA |
| 14 | 8 | 2010 | Nan | 43.4336 | -2.8050 Bakio, Bakio                 | Vizcaya      | MMA |
| 14 | 8 | 2010 | 4   | 43.4740 | -3.9104 Covachos, Bezana             | Cantabria    | MMA |
| 14 | 8 | 2010 | 3   | 43.4401 | -2.9353 Isla Villano, Armintza       | Vizcaya      | MMA |
| 14 | 8 | 2010 | 1   | 43.4726 | -3.7787 La Concha, Santander         | Cantabria    | MMA |
| 14 | 8 | 2010 | 3   | 43.4834 | -3.8348 La Maruca, Santander         | Cantabria    | MMA |
| 14 | 8 | 2010 | 1   | 43.4136 | -3.3697 Liendo, Liendo               | Cantabria    | MMA |
| 14 | 8 | 2010 | 2   | 43.4667 | -3.7690 Los Bikinis, Santander       | Cantabria    | MMA |
| 14 | 8 | 2010 | 3   | 43.4641 | -3.7781 Los Peligros, Santander      | Cantabria    | MMA |
| 14 | 8 | 2010 | 2   | 43.4667 | -3.7740 Magdalena, Santander         | Cantabria    | MMA |
| 14 | 8 | 2010 | 1   | 43.3941 | -4.3803 Merón                        | Cantabria    | MMA |
| 14 | 8 | 2010 | 2   | 43.4613 | -3.7944 Puerto Chico, Santander      | Cantabria    | MMA |
| 14 | 8 | 2010 | 1   | 43.3994 | -4.3668 San Vicente de la Barquera   | Cantabria    | MMA |
| 14 | 8 | 2010 | 4   | 43.4777 | -3.8753 Virgen del Mar, Santander    | Cantabria    | MMA |
| 15 | 8 | 2010 | 1   | 43.4378 | -4.8248 Barro, Llanes                | Asturias     | MMA |
| 15 | 8 | 2010 | 1   | 43.4368 | -4.8099 Borizú, Llanes               | Asturias     | MMA |
| 15 | 8 | 2010 | 1   | 43.4740 | -3.9104 Covachos, Bezana             | Cantabria    | MMA |
| 15 | 8 | 2010 | 1   | 43.4839 | -3.8329 El Bocal, Santander          | Cantabria    | MMA |
| 15 | 8 | 2010 | 1   | 43.4601 | -3.7591 Ribamontan al Mar            | Cantabria    | MMA |
| 15 | 8 | 2010 | 1   | 43.4785 | -5.2122 La Espasa, Caravia           | Asturias     | MMA |
| 15 | 8 | 2010 | 2   | 43.5084 | -5.2595 La Griega, Colunga           | Asturias     | MMA |
| 15 | 8 | 2010 | 4   | 43.4834 | -3.8348 La Maruca, Santander         | Cantabria    | MMA |
| 15 | 8 | 2010 | 3   | 43.4782 | -3.6893 Lanre, Ribamontan al Mar     | Cantabria    | MMA |
| 15 | 8 | 2010 | 2   | 43.4651 | -3.7264 Loredó, Ribamontan al Mar    | Cantabria    | MMA |
| 15 | 8 | 2010 | 1   | 43.6185 | -5.7854 Luanco, Gozón                | Asturias     | MMA |
| 15 | 8 | 2010 | 2   | 43.4769 | -5.1775 Morris, Caravia              | Asturias     | MMA |
| 15 | 8 | 2010 | 4   | 43.5501 | -5.4891 Nora - Rodiles, Villaviciosa | Asturias     | MMA |
| 15 | 8 | 2010 | 2   | 43.4340 | -4.8067 Palombina, Llanes            | Asturias     | MMA |
| 15 | 8 | 2010 | 1   | 43.4605 | -3.7341 Somo, Ribamontan al Mar      | Cantabria    | MMA |
| 15 | 8 | 2010 | 4   | 43.4687 | -3.9460 Somocuevas, Piélagos         | Cantabria    | MMA |
| 15 | 8 | 2010 | 3   | 43.4280 | -4.0950 Taqle / El Sable, Suances    | Cantabria    | MMA |
| 15 | 8 | 2010 | 1   | 43.4406 | -4.0007 Usgo, Miengo                 | Cantabria    | MMA |
| 16 | 8 | 2010 | Nan | 43.4336 | -2.8050 Bakio, Bakio                 | Vizcaya      | MMA |
| 16 | 8 | 2010 | 4   | 43.3293 | -1.9943 Donostia - San Sebastian     | Guipuzcoa    | MMA |
| 16 | 8 | 2010 | 1   | 43.4601 | -3.7591 Ribamontan al Mar            | Cantabria    | MMA |
| 16 | 8 | 2010 | 1   | 43.4989 | -3.5401 El Sable, Arnuelo            | Cantabria    | MMA |
| 16 | 8 | 2010 | 4   | 43.4792 | -3.7826 El Sardinero 2               | Cantabria    | MMA |
| 16 | 8 | 2010 | Nan | 43.4744 | -3.7794 El Sardinero, Santander      | Cantabria    | MMA |
| 16 | 8 | 2010 | 2   | 43.4821 | -3.6782 Ribamontan al Mar            | Cantabria    | MMA |
| 16 | 8 | 2010 | 2   | 43.4726 | -3.7787 La Concha, Santander         | Cantabria    | MMA |

|    |   |      |     |         |                                    |           |     |
|----|---|------|-----|---------|------------------------------------|-----------|-----|
| 16 | 8 | 2010 | 3   | 43.4813 | -5.2237 La Isla, Colunga           | Asturias  | MMA |
| 16 | 8 | 2010 | Nan | 43.4320 | -4.0341 La Ribera, Suances         | Cantabria | MMA |
| 16 | 8 | 2010 | 3   | 43.4234 | -3.4355 La Salve, Laredo           | Cantabria | MMA |
| 16 | 8 | 2010 | 3   | 43.5096 | -5.2684 Lastres, Colunga           | Asturias  | MMA |
| 16 | 8 | 2010 | 1   | 43.4641 | -3.7781 Los Peligros, Santander    | Cantabria | MMA |
| 16 | 8 | 2010 | 1   | 43.6185 | -5.7854 Luanco, Gozón              | Asturias  | MMA |
| 16 | 8 | 2010 | Nan | 43.4667 | -3.7740 Magdalena, Santander       | Cantabria | MMA |
| 16 | 8 | 2010 | 1   | 43.4340 | -4.8067 Palombina, Llanes          | Asturias  | MMA |
| 16 | 8 | 2010 | 1   | 43.4195 | -4.7471 Puertu Chicu, Llanes       | Asturias  | MMA |
| 16 | 8 | 2010 | Nan | 43.4745 | -3.8910 San Juan de la Canal       | Cantabria | MMA |
| 16 | 8 | 2010 | 2   | 43.4338 | -4.7889 San Martín, Llanes         | Asturias  | MMA |
| 16 | 8 | 2010 | 3   | 43.3315 | -3.0270 Santurtzi, Santurtzi       | Vizcaya   | MMA |
| 16 | 8 | 2010 | 1   | 43.4605 | -3.7341 Somo, Ribamontan al Mar    | Cantabria | MMA |
| 16 | 8 | 2010 | 2   | 43.4035 | -4.6545 Vidiago, Llanes            | Asturias  | MMA |
| 17 | 8 | 2010 | 1   | 43.5583 | -7.1706 Arealonga, Barreiros       | Lugo      | MMA |
| 17 | 8 | 2010 | 1   | 43.4617 | -4.9355 Cuevas del Mar, Llanes     | Asturias  | MMA |
| 17 | 8 | 2010 | 4   | 43.3293 | -1.9943 Donostia - San Sebastian   | Guipuzcoa | MMA |
| 17 | 8 | 2010 | 1   | 43.4703 | -3.7742 El Camello, Santander      | Cantabria | MMA |
| 17 | 8 | 2010 | 1   | 43.4744 | -3.7794 El Sardinero 1, Santander  | Cantabria | MMA |
| 17 | 8 | 2010 | Nan | 43.4792 | -3.7826 El Sardinero 2             | Cantabria | MMA |
| 17 | 8 | 2010 | 4   | 43.4782 | -3.6893 Langre, Ribamontan al Mar  | Cantabria | MMA |
| 17 | 8 | 2010 | Nan | 43.4782 | -3.6893 Langre, Ribamontan al Mar  | Cantabria | MMA |
| 17 | 8 | 2010 | 2   | 43.4651 | -3.7264 Loredo, Ribamontan al Mar  | Cantabria | MMA |
| 17 | 8 | 2010 | Nan | 43.4667 | -3.7690 Los Bikinis, Santander     | Cantabria | MMA |
| 17 | 8 | 2010 | 1   | 43.6185 | -5.7854 Luanco, Gozón              | Asturias  | MMA |
| 17 | 8 | 2010 | 1   | 43.6185 | -5.7854 Luanco, Gozón              | Asturias  | MMA |
| 17 | 8 | 2010 | Nan | 43.3654 | -3.1925 Mioño / Dicado             | Cantabria | MMA |
| 17 | 8 | 2010 | 1   | 43.4423 | -4.8372 Niembro / Toranda, Llanes  | Asturias  | MMA |
| 17 | 8 | 2010 | 1   | 43.4075 | -3.3194 Oriñón, Castro Urdiales    | Cantabria | MMA |
| 17 | 8 | 2010 | 1   | 43.3974 | -4.3282 Ovambre, Valdallioa        | Cantabria | MMA |
| 17 | 8 | 2010 | 2   | 43.4749 | -3.7824 Piquio, Santander          | Cantabria | MMA |
| 17 | 8 | 2010 | 1   | 43.4605 | -3.7341 Somo, Ribamontan al Mar    | Cantabria | MMA |
| 17 | 8 | 2010 | 1   | 43.4169 | -3.3317 Sonabia, Castro Urdiales   | Cantabria | MMA |
| 17 | 8 | 2010 | 1   | 43.6276 | -5.8793 Tenrero / Verdicio, Gozón  | Asturias  | MMA |
| 17 | 8 | 2010 | 2   | 43.4571 | -3.9730 Valdearenas, Piélaqos      | Cantabria | MMA |
| 17 | 8 | 2010 | 2   | 43.4777 | -3.8753 Virgen del Mar, Santander  | Cantabria | MMA |
| 18 | 8 | 2010 | 2   | 43.4378 | -4.8248 Barro, Llanes              | Asturias  | MMA |
| 18 | 8 | 2010 | 2   | 43.4368 | -4.8099 Borizú, Llanes             | Asturias  | MMA |
| 18 | 8 | 2010 | 1   | 43.4617 | -4.9355 Cuevas del Mar, Llanes     | Asturias  | MMA |
| 18 | 8 | 2010 | 4   | 43.3293 | -1.9943 Donostia - San Sebastian   | Guipuzcoa | MMA |
| 18 | 8 | 2010 | 1   | 43.4601 | -3.7591 Ribamontan al Mar          | Cantabria | MMA |
| 18 | 8 | 2010 | 1   | 43.4223 | -4.7495 El Sablón, Llanes          | Asturias  | MMA |
| 18 | 8 | 2010 | 1   | 43.4792 | -3.7826 El Sardinero 2             | Cantabria | MMA |
| 18 | 8 | 2010 | Nan | 43.4744 | -3.7794 El Sardinero, Santander    | Cantabria | MMA |
| 18 | 8 | 2010 | 2   | 43.5477 | -5.5294 España, Villaviciosa       | Asturias  | MMA |
| 18 | 8 | 2010 | Nan | 43.4821 | -3.6782 Ribamontan al Mar          | Cantabria | MMA |
| 18 | 8 | 2010 | 2   | 43.4726 | -3.7787 La Concha, Santander       | Cantabria | MMA |
| 18 | 8 | 2010 | 2   | 43.4234 | -3.4355 La Salve, Laredo           | Cantabria | MMA |
| 18 | 8 | 2010 | 1   | 43.3965 | -4.2206 Luaña / Cobreces           | Cantabria | MMA |
| 18 | 8 | 2010 | 3   | 43.4075 | -3.3194 Oriñón, Castro Urdiales    | Cantabria | MMA |
| 18 | 8 | 2010 | 1   | 43.4340 | -4.8067 Palombina, Llanes          | Asturias  | MMA |
| 18 | 8 | 2010 | 1   | 43.5836 | -5.9627 Salinas, Castrillón        | Asturias  | MMA |
| 18 | 8 | 2010 | 1   | 43.5901 | -5.9497 San Juan / Espartal        | Asturias  | MMA |
| 18 | 8 | 2010 | Nan | 43.4605 | -3.7341 Somo, Ribamontan al Mar    | Cantabria | MMA |
| 18 | 8 | 2010 | 3   | 43.4169 | -3.3317 Sonabia, Castro Urdiales   | Cantabria | MMA |
| 18 | 8 | 2010 | 1   | 43.4280 | -4.0950 Tagle / El Sable, Suances  | Cantabria | MMA |
| 18 | 8 | 2010 | 2   | 43.6085 | -5.9294 Xago, Gozón                | Asturias  | MMA |
| 19 | 8 | 2010 | 2   | 43.3752 | -3.2107 Brazomar, Castro Urdiales  | Cantabria | MMA |
| 19 | 8 | 2010 | 4   | 43.3293 | -1.9943 Donostia - San Sebastian   | Guipuzcoa | MMA |
| 19 | 8 | 2010 | 4   | 43.5084 | -5.2595 La Griega, Colunga         | Asturias  | MMA |
| 19 | 8 | 2010 | 2   | 43.5027 | -5.2354 La Isla - Lastres, Colunga | Asturias  | MMA |
| 19 | 8 | 2010 | 2   | 43.4813 | -5.2237 La Isla, Colunga           | Asturias  | MMA |
| 19 | 8 | 2010 | 3   | 43.5096 | -5.2684 Lastres, Colunga           | Asturias  | MMA |
| 19 | 8 | 2010 | 4   | 43.4391 | -4.0484 Los Locos, Suances         | Cantabria | MMA |
| 19 | 8 | 2010 | 2   | 43.3654 | -3.1925 Mioño / Dicado             | Cantabria | MMA |
| 19 | 8 | 2010 | 3   | 43.3873 | -3.2240 Ostende / Urdiales         | Cantabria | MMA |
| 19 | 8 | 2010 | 1   | 43.3854 | -3.2142 Peñón de Santa Ana         | Cantabria | MMA |
| 19 | 8 | 2010 | 1   | 43.5634 | -5.6858 Puerto de Gilón, Gilón     | Asturias  | MMA |
| 19 | 8 | 2010 | 1   | 43.5767 | -5.9961 Santa María del Mar        | Asturias  | MMA |
| 19 | 8 | 2010 | 4   | 43.4680 | -5.0707 Santa Marina, Ribadesella  | Asturias  | MMA |
| 19 | 8 | 2010 | 1   | 43.4577 | -3.8041 Santander                  | Cantabria | MMA |
| 19 | 8 | 2010 | 2   | 43.4280 | -4.0950 Tagle / El Sable, Suances  | Cantabria | MMA |
| 19 | 8 | 2010 | 2   | 43.4178 | -4.7409 Toro, Llanes               | Asturias  | MMA |
| 20 | 8 | 2010 | 1   | 43.3752 | -3.2107 Brazomar, Castro Urdiales  | Cantabria | MMA |
| 20 | 8 | 2010 | 4   | 43.3293 | -1.9943 Donostia - San Sebastian   | Guipuzcoa | MMA |
| 20 | 8 | 2010 | 1   | 43.4726 | -3.7787 La Concha, Santander       | Cantabria | MMA |
| 20 | 8 | 2010 | 4   | 43.5084 | -5.2595 La Griega, Colunga         | Asturias  | MMA |
| 20 | 8 | 2010 | 1   | 43.4234 | -3.4355 La Salve, Laredo           | Cantabria | MMA |
| 20 | 8 | 2010 | 1   | 43.5096 | -5.2684 Lastres, Colunga           | Asturias  | MMA |
| 20 | 8 | 2010 | 1   | 43.4864 | -3.7870 Matalaños, Santander       | Cantabria | MMA |
| 20 | 8 | 2010 | 2   | 43.3654 | -3.1925 Mioño / Dicado             | Cantabria | MMA |
| 20 | 8 | 2010 | 3   | 43.4835 | -3.7843 Molinuco, Santander        | Cantabria | MMA |
| 20 | 8 | 2010 | 1   | 43.4769 | -5.1775 Morris, Caravia            | Asturias  | MMA |
| 20 | 8 | 2010 | Nan | 43.3515 | -3.1181 Muskiz / La Arena, Muskiz  | Vizcaya   | MMA |
| 20 | 8 | 2010 | 2   | 43.3873 | -3.2240 Ostende / Urdiales         | Cantabria | MMA |
| 20 | 8 | 2010 | 2   | 43.3974 | -4.3282 Ovambre, Valdallioa        | Cantabria | MMA |
| 20 | 8 | 2010 | 4   | 43.4680 | -5.0707 Santa Marina, Ribadesella  | Asturias  | MMA |
| 20 | 8 | 2010 | 1   | 43.4744 | -3.7794 El Sardinero 1, Santander  | Cantabria | MMA |
| 20 | 8 | 2010 | Nan | 43.4169 | -3.3317 Sonabia, Castro Urdiales   | Cantabria | MMA |
| 21 | 8 | 2010 | 1   | 43.4748 | -3.9140 Arnia, Piélaqos            | Cantabria | MMA |
| 21 | 8 | 2010 | 3   | 43.3812 | -3.2138 Bahía, Castro Urdiales     | Cantabria | MMA |
| 21 | 8 | 2010 | 2   | 43.4368 | -4.8099 Borizú, Llanes             | Asturias  | MMA |
| 21 | 8 | 2010 | 3   | 43.3784 | -3.2093 Castro Urdiales            | Cantabria | MMA |
| 21 | 8 | 2010 | 4   | 43.3293 | -1.9943 Donostia - San Sebastian   | Guipuzcoa | MMA |
| 21 | 8 | 2010 | Nan | 43.4703 | -3.7742 El Camello, Santander      | Cantabria | MMA |
| 21 | 8 | 2010 | 1   | 43.4601 | -3.7591 Ribamontan al Mar          | Cantabria | MMA |
| 21 | 8 | 2010 | Nan | 43.4792 | -3.7826 El Sardinero 2             | Cantabria | MMA |
| 21 | 8 | 2010 | 1   | 43.4768 | -3.4768 Helquera, Noja             | Cantabria | MMA |
| 21 | 8 | 2010 | 1   | 43.4813 | -5.2237 La Isla, Colunga           | Asturias  | MMA |
| 21 | 8 | 2010 | 3   | 43.4234 | -3.4355 La Salve, Laredo           | Cantabria | MMA |
| 21 | 8 | 2010 | Nan | 43.5049 | -3.5449 Los Franceses, Arnuero     | Cantabria | MMA |
| 21 | 8 | 2010 | Nan | 43.4667 | -3.7740 Magdalena, Santander       | Cantabria | MMA |
| 21 | 8 | 2010 | 1   | 43.4864 | -3.7870 Matalaños, Santander       | Cantabria | MMA |
| 21 | 8 | 2010 | Nan | 43.3515 | -3.1181 Muskiz / La Arena, Muskiz  | Vizcaya   | MMA |
| 21 | 8 | 2010 | 1   | 43.4340 | -4.8067 Palombina, Llanes          | Asturias  | MMA |
| 21 | 8 | 2010 | 1   | 43.4749 | -3.7824 Piquio, Santander          | Cantabria | MMA |
| 21 | 8 | 2010 | 4   | 43.4376 | -3.4514 San Martín, Santoña        | Cantabria | MMA |
| 21 | 8 | 2010 | 2   | 43.4605 | -3.7341 Somo, Ribamontan al Mar    | Cantabria | MMA |
| 21 | 8 | 2010 | 1   | 43.4455 | -4.8522 Torimbia, Llanes           | Asturias  | MMA |
| 22 | 8 | 2010 | 1   | 43.3812 | -3.2138 Bahía, Castro Urdiales     | Cantabria | MMA |
| 22 | 8 | 2010 | 1   | 43.4740 | -3.9104 Covachos, Bezana           | Cantabria | MMA |
| 22 | 8 | 2010 | 4   | 43.3293 | -1.9943 Donostia - San Sebastian   | Guipuzcoa | MMA |
| 22 | 8 | 2010 | 2   | 43.4015 | -4.3573 El Cabo / Gerra            | Cantabria | MMA |
| 22 | 8 | 2010 | 2   | 43.4703 | -3.7742 El Camello, Santander      | Cantabria | MMA |
| 22 | 8 | 2010 | 2   | 43.3864 | -4.3889 El Rosal                   | Cantabria | MMA |
| 22 | 8 | 2010 | 1   | 43.4744 | -3.7794 El Sardinero 1, Santander  | Cantabria | MMA |
| 22 | 8 | 2010 | 1   | 43.4792 | -3.7826 El Sardinero 2             | Cantabria | MMA |
| 22 | 8 | 2010 | Nan | 43.4726 | -3.7787 La Concha, Santander       | Cantabria | MMA |

|    |   |      |     |         |                                     |           |     |
|----|---|------|-----|---------|-------------------------------------|-----------|-----|
| 22 | 8 | 2010 | 1   | 43.4749 | -3.7824 Piquio, Santander           | Cantabria | MMA |
| 22 | 8 | 2010 | Nan | 43.4280 | -4.0950 Tagle / El Sable, Suances   | Cantabria | MMA |
| 22 | 8 | 2010 | 1   | 43.4377 | -4.8186 Troenzo, Llanes             | Asturias  | MMA |
| 22 | 8 | 2010 | 1   | 43.4777 | -3.8753 Virgen del Mar, Santander   | Cantabria | MMA |
| 23 | 8 | 2010 | Nan | 43.3914 | -4.2862 Comillas, Comillas          | Cantabria | MMA |
| 23 | 8 | 2010 | 2   | 43.3654 | -3.1925 Dicido, Castro Urdiales     | Cantabria | MMA |
| 23 | 8 | 2010 | 4   | 43.3293 | -1.9943 Donostia - San Sebastian    | Guipuzcoa | MMA |
| 23 | 8 | 2010 | 3   | 43.4601 | -3.7591 Ribamontan al Mar           | Cantabria | MMA |
| 23 | 8 | 2010 | 2   | 43.4234 | -3.4355 La Salve, Laredo            | Cantabria | MMA |
| 23 | 8 | 2010 | 1   | 43.4782 | -3.6893 Ribamontan al Mar           | Cantabria | MMA |
| 23 | 8 | 2010 | 1   | 43.4667 | -3.7690 Los Bikinis, Santander      | Cantabria | MMA |
| 23 | 8 | 2010 | 3   | 43.4864 | -3.7870 Mataleñas, Santander        | Cantabria | MMA |
| 23 | 8 | 2010 | 1   | 43.3873 | -3.2240 Ostende / Urdiales          | Cantabria | MMA |
| 23 | 8 | 2010 | 2   | 43.3974 | -4.3282 Oyambre, Valdaliga          | Cantabria | MMA |
| 23 | 8 | 2010 | 2   | 43.3504 | -3.0507 Puerto Santurtzi, Santurtzi | Vizcaya   | MMA |
| 23 | 8 | 2010 | 2   | 43.4605 | -3.7341 Somo, Ribamontan al Mar     | Cantabria | MMA |
| 23 | 8 | 2010 | 1   | 43.4777 | -3.8753 Virgen del Mar, Santander   | Cantabria | MMA |
| 24 | 8 | 2010 | 2   | 43.4605 | -3.7991 Cabo Mayor, Santander       | Cantabria | MMA |
| 24 | 8 | 2010 | 5   | 43.3293 | -1.9943 Donostia - San Sebastian    | Guipuzcoa | MMA |
| 24 | 8 | 2010 | 2   | 43.4703 | -3.7742 El Camello, Santander       | Cantabria | MMA |
| 24 | 8 | 2010 | 2   | 43.4782 | -3.6893 Langre 1                    | Cantabria | MMA |
| 24 | 8 | 2010 | 1   | 43.4749 | -3.7824 Piquio, Santander           | Cantabria | MMA |
| 25 | 8 | 2010 | 2   | 43.4039 | -3.3133 Arenillas / Islares         | Cantabria | MMA |
| 25 | 8 | 2010 | 1   | 43.3752 | -3.2107 Brazomar, Castro Urdiales   | Cantabria | MMA |
| 25 | 8 | 2010 | 1   | 43.3654 | -3.1925 Dicido, Castro Urdiales     | Cantabria | MMA |
| 25 | 8 | 2010 | 4   | 43.3293 | -1.9943 Donostia - San Sebastian    | Guipuzcoa | MMA |
| 25 | 8 | 2010 | 2   | 43.4703 | -3.7742 El Camello, Santander       | Cantabria | MMA |
| 25 | 8 | 2010 | 2   | 43.4601 | -3.7591 Ribamontan al Mar           | Cantabria | MMA |
| 25 | 8 | 2010 | 2   | 43.4726 | -3.7787 La Concha, Santander        | Cantabria | MMA |
| 25 | 8 | 2010 | 1   | 43.4372 | -4.0410 La Concha, Suances          | Cantabria | MMA |
| 25 | 8 | 2010 | 2   | 43.4320 | -4.0341 La Ribera, Suances          | Cantabria | MMA |
| 25 | 8 | 2010 | 2   | 43.4234 | -3.4355 La Salve, Laredo            | Cantabria | MMA |
| 25 | 8 | 2010 | 2   | 43.4782 | -3.6893 Ribamontan al Mar           | Cantabria | MMA |
| 25 | 8 | 2010 | 1   | 43.6185 | -5.7854 Luanco, Gozón               | Asturias  | MMA |
| 25 | 8 | 2010 | 2   | 43.3965 | -4.2206 Luaña / Cobreces            | Cantabria | MMA |
| 25 | 8 | 2010 | 4   | 43.4864 | -3.7870 Mataleñas, Santander        | Cantabria | MMA |
| 25 | 8 | 2010 | 1   | 43.4835 | -3.7843 Molinucos, Santander        | Cantabria | MMA |
| 25 | 8 | 2010 | 1   | 43.3873 | -3.2240 Ostende / Urdiales          | Cantabria | MMA |
| 25 | 8 | 2010 | 2   | 43.4749 | -3.7824 Piquio, Santander           | Cantabria | MMA |
| 25 | 8 | 2010 | 2   | 43.4744 | -3.7794 Sardinero 1, Santander      | Cantabria | MMA |
| 25 | 8 | 2010 | 2   | 43.4792 | -3.7826 Sardinero 2, Santander      | Cantabria | MMA |
| 26 | 8 | 2010 | Nan | 43.4573 | -3.9623 Canallave, Piélagos         | Cantabria | MMA |
| 26 | 8 | 2010 | 4   | 43.3293 | -1.9943 Donostia - San Sebastian    | Guipuzcoa | MMA |
| 26 | 8 | 2010 | 2   | 43.4605 | -3.7991 Embarcadero, Santander      | Cantabria | MMA |
| 26 | 8 | 2010 | 3   | 43.4605 | -3.7991 Ferri-Nautico Pesquero      | Cantabria | MMA |
| 26 | 8 | 2010 | 2   | 43.4372 | -4.0410 La Concha, Suances          | Cantabria | MMA |
| 26 | 8 | 2010 | 1   | 43.5084 | -5.2595 La Griega, Colunga          | Asturias  | MMA |
| 26 | 8 | 2010 | 2   | 43.4234 | -3.4355 La Salve, Laredo            | Cantabria | MMA |
| 26 | 8 | 2010 | 1   | 43.5096 | -5.2684 Lastres, Colunga            | Asturias  | MMA |
| 26 | 8 | 2010 | 2   | 43.4641 | -3.7781 Los Peligros, Santander     | Cantabria | MMA |
| 26 | 8 | 2010 | 1   | 43.4667 | -3.7740 Magdalena, Santander        | Cantabria | MMA |
| 26 | 8 | 2010 | 1   | 43.4075 | -3.3194 Oriñón, Castro Urdiales     | Cantabria | MMA |
| 26 | 8 | 2010 | 2   | 43.4169 | -3.3317 Sonabia, Castro Urdiales    | Cantabria | MMA |
| 26 | 8 | 2010 | Nan | 43.4571 | -3.9730 Valdearenas, Piélagos       | Cantabria | MMA |
| 27 | 8 | 2010 | Nan | 43.3566 | -3.0219 Arriquinaqa, Getxo          | Vizcaya   | MMA |
| 27 | 8 | 2010 | 1   | 43.3654 | -3.1925 Dicido, Castro Urdiales     | Cantabria | MMA |
| 27 | 8 | 2010 | 4   | 43.3293 | -1.9943 Donostia - San Sebastian    | Guipuzcoa | MMA |
| 27 | 8 | 2010 | 2   | 43.4667 | -3.7690 Los Bikinis, Santander      | Cantabria | MMA |
| 27 | 8 | 2010 | Nan | 43.3941 | -4.3803 San Vicente de la Barquera  | Cantabria | MMA |
| 27 | 8 | 2010 | 2   | 43.4460 | -4.8702 San Antolín, Llanes         | Asturias  | MMA |
| 27 | 8 | 2010 | 3   | 43.4338 | -4.7889 San Martín, Llanes          | Asturias  | MMA |
| 27 | 8 | 2010 | 1   | 43.4571 | -3.9730 Valdearenas, Piélagos       | Cantabria | MMA |
| 27 | 8 | 2010 | 3   | 43.3994 | -4.3668 San Vicente de la Barquera  | Cantabria | MMA |
| 28 | 8 | 2010 | 2   | 43.4748 | -3.9140 Arnia, Piélagos             | Cantabria | MMA |
| 28 | 8 | 2010 | 3   | 43.4577 | -3.8041 Bahía de Santander          | Cantabria | MMA |
| 28 | 8 | 2010 | 2   | 43.4792 | -3.7826 Castañeda, Santander        | Cantabria | MMA |
| 28 | 8 | 2010 | 1   | 43.3914 | -4.2862 Comillas, Comillas          | Cantabria | MMA |
| 28 | 8 | 2010 | Nan | 43.4740 | -3.9104 Covachos, Bezana            | Cantabria | MMA |
| 28 | 8 | 2010 | 4   | 43.5010 | -3.6130 Cuberris, Bareyo            | Cantabria | MMA |
| 28 | 8 | 2010 | 4   | 43.3293 | -1.9943 Donostia - San Sebastian    | Guipuzcoa | MMA |
| 28 | 8 | 2010 | 2   | 43.4703 | -3.7742 El Camello, Santander       | Cantabria | MMA |
| 28 | 8 | 2010 | 3   | 43.4601 | -3.7591 El Puntal                   | Cantabria | MMA |
| 28 | 8 | 2010 | 2   | 43.4744 | -3.7794 El Sardinero 1, Santander   | Cantabria | MMA |
| 28 | 8 | 2010 | 2   | 43.4821 | -3.6782 La Canal                    | Cantabria | MMA |
| 28 | 8 | 2010 | 3   | 43.4726 | -3.7787 La Concha, Santander        | Cantabria | MMA |
| 28 | 8 | 2010 | 3   | 43.4234 | -3.4355 La Salve, Laredo            | Cantabria | MMA |
| 28 | 8 | 2010 | 2   | 43.4782 | -3.6893 Langre, Ribamontan al Mar   | Cantabria | MMA |
| 28 | 8 | 2010 | 2   | 43.4651 | -3.7264 Loredo, Ribamontan al Mar   | Cantabria | MMA |
| 28 | 8 | 2010 | Nan | 43.4667 | -3.7740 Magdalena, Santander        | Cantabria | MMA |
| 28 | 8 | 2010 | 2   | 43.4864 | -3.7870 Mataleñas, Santander        | Cantabria | MMA |
| 28 | 8 | 2010 | 3   | 43.3974 | -4.3282 Oyambre, Valdaliga          | Cantabria | MMA |
| 28 | 8 | 2010 | 2   | 43.4749 | -3.7824 Piquio, Santander           | Cantabria | MMA |
| 28 | 8 | 2010 | 2   | 43.4745 | -3.8910 San Juan de la Canal        | Cantabria | MMA |
| 28 | 8 | 2010 | 1   | 43.4605 | -3.7341 Somo, Ribamontan al Mar     | Cantabria | MMA |
| 28 | 8 | 2010 | 2   | 43.4571 | -3.9730 Valdearenas, Piélagos       | Cantabria | MMA |
| 28 | 8 | 2010 | 2   | 43.4777 | -3.8753 Virgen del Mar, Santander   | Cantabria | MMA |
| 29 | 8 | 2010 | 2   | 43.4748 | -3.9140 Arnia, Piélagos             | Cantabria | MMA |
| 29 | 8 | 2010 | 2   | 43.4368 | -4.8099 Borizú, Llanes              | Asturias  | MMA |
| 29 | 8 | 2010 | 2   | 43.4605 | -3.7991 Cabo Mayor, Santander       | Cantabria | MMA |
| 29 | 8 | 2010 | 2   | 43.3914 | -4.2862 Comillas, Comillas          | Cantabria | MMA |
| 29 | 8 | 2010 | 1   | 43.4740 | -3.9104 Covachos, Bezana            | Cantabria | MMA |
| 29 | 8 | 2010 | 2   | 43.3654 | -3.1925 Dicido, Castro Urdiales     | Cantabria | MMA |
| 29 | 8 | 2010 | 4   | 43.3293 | -1.9943 Donostia - San Sebastian    | Guipuzcoa | MMA |
| 29 | 8 | 2010 | 2   | 43.4703 | -3.7742 El Camello, Santander       | Cantabria | MMA |
| 29 | 8 | 2010 | 2   | 43.4601 | -3.7591 El Puntal                   | Cantabria | MMA |
| 29 | 8 | 2010 | 3   | 43.5074 | -3.5786 La Arena, Arnuero           | Cantabria | MMA |
| 29 | 8 | 2010 | 1   | 43.4372 | -4.0410 La Concha, Suances          | Cantabria | MMA |
| 29 | 8 | 2010 | 1   | 43.5084 | -5.2595 La Griega, Colunga          | Asturias  | MMA |
| 29 | 8 | 2010 | 1   | 43.4320 | -4.0341 La Ribera, Suances          | Cantabria | MMA |
| 29 | 8 | 2010 | 1   | 43.4782 | -3.6893 Langre, Ribamontan al Mar   | Cantabria | MMA |
| 29 | 8 | 2010 | Nan | 43.4667 | -3.7690 Los Bikinis, Santander      | Cantabria | MMA |
| 29 | 8 | 2010 | 1   | 43.4749 | -3.7824 Piquio, Santander           | Cantabria | MMA |
| 29 | 8 | 2010 | 1   | 43.4332 | -4.7854 Poó, Llanes                 | Asturias  | MMA |
| 29 | 8 | 2010 | 2   | 43.4195 | -4.7471 Puertu Chicú, Llanes        | Asturias  | MMA |
| 29 | 8 | 2010 | 3   | 43.4605 | -3.7341 Somo, Ribamontan al Mar     | Cantabria | MMA |
| 29 | 8 | 2010 | 1   | 43.4178 | -4.7409 Toró, Llanes                | Asturias  | MMA |
| 29 | 8 | 2010 | 2   | 43.4777 | -3.8753 Virgen del Mar, Santander   | Cantabria | MMA |
| 30 | 8 | 2010 | 1   | 43.4137 | -4.7114 Ballota, Llanes             | Asturias  | MMA |
| 30 | 8 | 2010 | 2   | 43.4378 | -4.8248 Barro, Llanes               | Asturias  | MMA |
| 30 | 8 | 2010 | 3   | 43.4368 | -4.8099 Borizú, Llanes              | Asturias  | MMA |
| 30 | 8 | 2010 | 1   | 43.4573 | -3.9623 Canallave, Piélagos         | Cantabria | MMA |
| 30 | 8 | 2010 | 1   | 43.5788 | -5.7426 Carranques, Carreño         | Asturias  | MMA |
| 30 | 8 | 2010 | 1   | 43.4223 | -4.7495 El Sablón, Llanes           | Asturias  | MMA |
| 30 | 8 | 2010 | 1   | 43.4744 | -3.7794 El Sardinero, Santander     | Cantabria | MMA |
| 30 | 8 | 2010 | 2   | 43.4234 | -3.4355 La Salve, Laredo            | Cantabria | MMA |
| 30 | 8 | 2010 | 2   | 43.5096 | -5.2684 Lastres, Colunga            | Asturias  | MMA |
| 30 | 8 | 2010 | 2   | 43.4075 | -3.3194 Oriñón, Castro Urdiales     | Cantabria | MMA |
| 30 | 8 | 2010 | 1   | 43.3873 | -3.2240 Ostende, Castro Urdiales    | Cantabria | MMA |

|    |    |      |     |         |          |                                  |                  |                                                                                                                                                                                                                                                                                                                           |  |
|----|----|------|-----|---------|----------|----------------------------------|------------------|---------------------------------------------------------------------------------------------------------------------------------------------------------------------------------------------------------------------------------------------------------------------------------------------------------------------------|--|
| 30 | 8  | 2010 | 3   | 43.3974 | -4.3282  | Ovambre, Valdaliga               | Cantabria        | MMA                                                                                                                                                                                                                                                                                                                       |  |
| 30 | 8  | 2010 | 2   | 43.4332 | -4.7854  | Poó, Llanes                      | Asturias         | MMA                                                                                                                                                                                                                                                                                                                       |  |
| 30 | 8  | 2010 | 2   | 43.4601 | -4.9264  | San Antonio, Llanes              | Asturias         | MMA                                                                                                                                                                                                                                                                                                                       |  |
| 30 | 8  | 2010 | 4   | 43.4338 | -4.7889  | San Martín, Llanes               | Asturias         | MMA                                                                                                                                                                                                                                                                                                                       |  |
| 30 | 8  | 2010 | 3   | 43.4423 | -4.8372  | Toranda / Niembro, Llanes        | Asturias         | MMA                                                                                                                                                                                                                                                                                                                       |  |
| 31 | 8  | 2010 | 2   | 43.4132 | -4.7067  | Andrín, Llanes                   | Asturias         | MMA                                                                                                                                                                                                                                                                                                                       |  |
| 31 | 8  | 2010 | 2   | 43.3752 | -3.2107  | Brazomar, Castro Urdiales        | Cantabria        | MMA                                                                                                                                                                                                                                                                                                                       |  |
| 31 | 8  | 2010 | 2   | 43.3831 | -3.2114  | El Rompeolas                     | Cantabria        | MMA                                                                                                                                                                                                                                                                                                                       |  |
| 31 | 8  | 2010 | 1   | 43.4223 | -4.7495  | El Sablón, Llanes                | Asturias         | MMA                                                                                                                                                                                                                                                                                                                       |  |
| 31 | 8  | 2010 | 1   | 43.4726 | -3.7787  | La Concha, Santander             | Cantabria        | MMA                                                                                                                                                                                                                                                                                                                       |  |
| 31 | 8  | 2010 | 5   | 43.4234 | -3.4355  | La Salve, Laredo                 | Cantabria        | MMA                                                                                                                                                                                                                                                                                                                       |  |
| 31 | 8  | 2010 | 1   | 43.3965 | -4.2206  | Luaña, Alfoz de Lloredo          | Cantabria        | MMA                                                                                                                                                                                                                                                                                                                       |  |
| 31 | 8  | 2010 | Nan | 43.4667 | -3.7740  | Magdalena, Santander             | Cantabria        | MMA                                                                                                                                                                                                                                                                                                                       |  |
| 31 | 8  | 2010 | 1   | 43.4864 | -3.7870  | Mataleñas, Santander             | Cantabria        | MMA                                                                                                                                                                                                                                                                                                                       |  |
| 31 | 8  | 2010 | 1   | 43.3873 | -3.2240  | Ostende, Castro Urdiales         | Cantabria        | MMA                                                                                                                                                                                                                                                                                                                       |  |
| 31 | 8  | 2010 | 3   | 43.3974 | -4.3282  | Ovambre, Valdaliga               | Cantabria        | MMA                                                                                                                                                                                                                                                                                                                       |  |
| 2  | 9  | 2010 | 1   | 43.3752 | -3.2107  | Brazomar, Castro Urdiales        | Cantabria        | MMA                                                                                                                                                                                                                                                                                                                       |  |
| 2  | 9  | 2010 | 1   | 43.4821 | -3.6782  | Galizano                         | Asturias         | MMA                                                                                                                                                                                                                                                                                                                       |  |
| 2  | 9  | 2010 | 2   | 43.4234 | -3.4355  | La Salve, Laredo                 | Cantabria        | MMA                                                                                                                                                                                                                                                                                                                       |  |
| 2  | 9  | 2010 | 1   | 43.3873 | -3.2240  | Ostende, Castro Urdiales         | Cantabria        | MMA                                                                                                                                                                                                                                                                                                                       |  |
| 3  | 9  | 2010 | 2   | 43.4234 | -3.4355  | La Salve, Laredo                 | Cantabria        | MMA                                                                                                                                                                                                                                                                                                                       |  |
| 4  | 9  | 2010 | 2   | 43.5010 | -3.6130  | Cuberris, Bareyo                 | Cantabria        | MMA                                                                                                                                                                                                                                                                                                                       |  |
| 4  | 9  | 2010 | 1   | 43.4234 | -3.4355  | Laredo, Laredo                   | Cantabria        | MMA                                                                                                                                                                                                                                                                                                                       |  |
| 4  | 9  | 2010 | 1   | 43.4340 | -4.8067  | Palombina, Llanes                | Asturias         | MMA                                                                                                                                                                                                                                                                                                                       |  |
| 5  | 9  | 2010 | 2   | 43.3654 | -3.1925  | Dicio, Castro Urdiales           | Cantabria        | MMA                                                                                                                                                                                                                                                                                                                       |  |
| 5  | 9  | 2010 | 1   | 43.4234 | -3.4355  | La Salve, Laredo                 | Cantabria        | MMA                                                                                                                                                                                                                                                                                                                       |  |
| 6  | 9  | 2010 | 1   | 43.4821 | -3.6782  | Galizano                         | Asturias         | MMA                                                                                                                                                                                                                                                                                                                       |  |
| 6  | 9  | 2010 | 2   | 43.4234 | -3.4355  | La Salve, Laredo                 | Asturias         | MMA                                                                                                                                                                                                                                                                                                                       |  |
| 8  | 9  | 2010 | 2   | 43.4605 | -3.7991  | Cabo Mayor, Santander            | Cantabria        | MMA                                                                                                                                                                                                                                                                                                                       |  |
| 8  | 9  | 2010 | 1   | 43.5901 | -5.9497  | San Juan / Espartal              | Asturias         | MMA                                                                                                                                                                                                                                                                                                                       |  |
| 9  | 9  | 2010 | 2   | 43.4782 | -3.6893  | Lanore, Ribamontan al Mar        | Asturias         | MMA                                                                                                                                                                                                                                                                                                                       |  |
| 10 | 9  | 2010 | 2   | 43.4792 | -3.7826  | Castañeda, Santander             | Asturias         | MMA                                                                                                                                                                                                                                                                                                                       |  |
| 10 | 9  | 2010 | 1   | 43.4864 | -3.7870  | Mataleñas, Santander             | Asturias         | MMA                                                                                                                                                                                                                                                                                                                       |  |
| 10 | 9  | 2010 | Nan | 43.4749 | -3.7824  | Piquito, Santander               | Asturias         | MMA                                                                                                                                                                                                                                                                                                                       |  |
| 10 | 9  | 2010 | 1   | 43.4744 | -3.7794  | Sardinero 1, Santander           | Asturias         | MMA                                                                                                                                                                                                                                                                                                                       |  |
| 11 | 9  | 2010 | 1   | 43.4864 | -3.7870  | Mataleñas, Santander             | Asturias         | MMA                                                                                                                                                                                                                                                                                                                       |  |
| 11 | 9  | 2010 | 2   | 43.4835 | -3.7843  | Molinucos, Santander             | Asturias         | MMA                                                                                                                                                                                                                                                                                                                       |  |
| 13 | 9  | 2010 | 2   | 43.4726 | -3.7787  | La Concha, Santander             | Cantabria        | MMA                                                                                                                                                                                                                                                                                                                       |  |
| 13 | 9  | 2010 | 2   | 43.4234 | -3.4355  | La Salve, Laredo                 | Cantabria        | MMA                                                                                                                                                                                                                                                                                                                       |  |
| 13 | 9  | 2010 | 2   | 43.4749 | -3.7824  | Piquito, Santander               | Cantabria        | MMA                                                                                                                                                                                                                                                                                                                       |  |
| 13 | 9  | 2010 | 2   | 43.4744 | -3.7794  | Sardinero 1, Santander           | Cantabria        | MMA                                                                                                                                                                                                                                                                                                                       |  |
| 13 | 9  | 2010 | 2   | 43.4792 | -3.7826  | Sardinero 2, Santander           | Cantabria        | MMA                                                                                                                                                                                                                                                                                                                       |  |
| 14 | 9  | 2010 | 2   | 43.4234 | -3.4355  | La Salve, Laredo                 | Cantabria        | MMA                                                                                                                                                                                                                                                                                                                       |  |
| 14 | 9  | 2010 | 1   | 43.3854 | -3.2142  | Peñón de Santa Ana               | Cantabria        | MMA                                                                                                                                                                                                                                                                                                                       |  |
| 15 | 9  | 2010 | 2   | 43.4039 | -2.6355  | Elantxobe                        | Vizcaya          | MMA                                                                                                                                                                                                                                                                                                                       |  |
| 15 | 9  | 2010 | Nan | 43.4110 | -2.6584  | Laga, Ibarrangelu                | Vizcaya          | MMA                                                                                                                                                                                                                                                                                                                       |  |
| 15 | 9  | 2010 | 1   | 28.3786 | -16.7273 | San Marcos                       | Tenerife         | MMA                                                                                                                                                                                                                                                                                                                       |  |
| 20 | 9  | 2010 | Nan | 43.3643 | -2.4930  | Karraspio, Mendexa               | Vizcaya          | MMA                                                                                                                                                                                                                                                                                                                       |  |
| 22 | 9  | 2010 | 3   | 43.5452 | -5.6538  | Gilión                           | Asturias         | MMA                                                                                                                                                                                                                                                                                                                       |  |
| 22 | 9  | 2010 | 2   | 43.6325 | -5.7798  | Punta de la Vaca, Gozón          | Asturias         | MMA                                                                                                                                                                                                                                                                                                                       |  |
| 26 | 9  | 2010 | 2   | 43.4713 | -3.4631  | Berria, Santoña                  | Cantabria        | MMA                                                                                                                                                                                                                                                                                                                       |  |
| 26 | 9  | 2010 | 2   | 43.5074 | -3.5786  | La Arena, Arnuero                | Cantabria        | MMA                                                                                                                                                                                                                                                                                                                       |  |
| 8  | 2  | 2011 | 1   | 36.7376 | -3.8044  | City                             | Málaga           | Consejería de Medio Ambiente                                                                                                                                                                                                                                                                                              |  |
| 8  | 2  | 2011 | 1   | 36.7055 | -3.8219  | City                             | Málaga           | Consejería de Medio Ambiente                                                                                                                                                                                                                                                                                              |  |
| 8  | 3  | 2011 | 5   | 28.4129 | -16.5616 | Jardín, Puerto de la Cruz        | St Cruz Tenerife | <a href="http://www.rtv.c.es/noticias/invasi%C3%B3n-de-medusas-en-la-paya-jard%C3%ADn-de-puerto-de-la-cruz-66165.aspx">http://www.rtv.c.es/noticias/invasi%C3%B3n-de-medusas-en-la-paya-jard%C3%ADn-de-puerto-de-la-cruz-66165.aspx</a>                                                                                   |  |
| 18 | 3  | 2011 | 4   | 28.5077 | -16.1834 | Las Teresitas                    | St Cruz Tenerife | <a href="http://www.laopinion.es/teneferie/2011/03/22/desaconsejan-bano-llagada-aguavivas-playa/335663.html">http://www.laopinion.es/teneferie/2011/03/22/desaconsejan-bano-llagada-aguavivas-playa/335663.html</a>                                                                                                       |  |
| 19 | 3  | 2011 | 4   | 28.5077 | -16.1834 | Las Teresitas                    | St Cruz Tenerife | <a href="http://www.rtv.c.es/noticias/invasi%C3%B3n-de-medusas-66772.aspx">http://www.rtv.c.es/noticias/invasi%C3%B3n-de-medusas-66772.aspx</a>                                                                                                                                                                           |  |
| 19 | 3  | 2011 | 4   | 28.1422 | -15.4386 | Las Canteras                     | Gran Canaria     | <a href="http://www.rtv.c.es/noticias/invasi%C3%B3n-de-medusas-66772.aspx">http://www.rtv.c.es/noticias/invasi%C3%B3n-de-medusas-66772.aspx</a>                                                                                                                                                                           |  |
| 20 | 3  | 2011 | 4   | 28.5077 | -16.1834 | Las Teresitas                    | St Cruz Tenerife | <a href="http://www.laopinion.es/teneferie/2011/03/22/desaconsejan-bano-llagada-aguavivas-playa/335663.html">http://www.laopinion.es/teneferie/2011/03/22/desaconsejan-bano-llagada-aguavivas-playa/335663.html</a>                                                                                                       |  |
| 29 | 3  | 2011 | 4   | 28.2506 | -16.3818 | Punta Prieta (Güímar)            | St Cruz Tenerife | <a href="http://www.edia.es/2011-03-30/ULTIMA/8-Invasion-medusas.htm">http://www.edia.es/2011-03-30/ULTIMA/8-Invasion-medusas.htm</a>                                                                                                                                                                                     |  |
| 29 | 3  | 2011 | 4   | 28.2446 | -16.3948 | Chimale (Güímar)                 | St Cruz Tenerife | <a href="http://www.edia.es/2011-03-30/ULTIMA/8-Invasion-medusas.htm">http://www.edia.es/2011-03-30/ULTIMA/8-Invasion-medusas.htm</a>                                                                                                                                                                                     |  |
| 29 | 3  | 2011 | 4   | 28.2404 | -16.4010 | Tablado (Güímar)                 | St Cruz Tenerife | <a href="http://www.edia.es/2011-03-30/ULTIMA/8-Invasion-medusas.htm">http://www.edia.es/2011-03-30/ULTIMA/8-Invasion-medusas.htm</a>                                                                                                                                                                                     |  |
| 2  | 4  | 2011 | 4   | 28.1422 | -15.4386 | Las Canteras                     | Gran Canaria     | <a href="http://www.rtv.c.es/noticias/m%C3%A1s-de-40-casos-de-picadura-de-medusas-en-las-canteras-87707.aspx">http://www.rtv.c.es/noticias/m%C3%A1s-de-40-casos-de-picadura-de-medusas-en-las-canteras-87707.aspx</a>                                                                                                     |  |
| 21 | 4  | 2011 | 1   | 36.7279 | -3.7229  | Marina del Este, Almuñecar       | Granada          | Aquatuors                                                                                                                                                                                                                                                                                                                 |  |
| 7  | 5  | 2011 | 1   | 38.5530 | 0.1978   | North and center of the province | Alicante         | <a href="http://www.lasprovincias.es/v/20110528/valencia/peligrosa-medusa-amenaza-nuevo-20110528.html">http://www.lasprovincias.es/v/20110528/valencia/peligrosa-medusa-amenaza-nuevo-20110528.html</a>                                                                                                                   |  |
| 11 | 5  | 2011 | 1   | 38.5530 | 0.1978   | North and center of the province | Alicante         | <a href="http://www.lasprovincias.es/v/20110528/valencia/peligrosa-medusa-amenaza-nuevo-20110528.html">http://www.lasprovincias.es/v/20110528/valencia/peligrosa-medusa-amenaza-nuevo-20110528.html</a>                                                                                                                   |  |
| 5  | 6  | 2011 | 1   | 38.4200 | 0.3475   | El Campello                      | Alicante         | Cudomar SL                                                                                                                                                                                                                                                                                                                |  |
| 16 | 6  | 2011 | 1   | 36.1619 | -5.3590  | Poniente (La línea)              | Cádiz            | <a href="http://www.europasur.es/articulo/la/linea/1000168/la/playa/poniente/es/cerrada/bano/por/med-usas.html">http://www.europasur.es/articulo/la/linea/1000168/la/playa/poniente/es/cerrada/bano/por/med-usas.html</a>                                                                                                 |  |
| 1  | 7  | 2011 | 2   | 43.3177 | -2.0011  | Ondarreta                        | Guipúzcoa        | <a href="http://www.dianovasco.com/20110705/local/heridos-leves-picaduras-medusas-201107051840.html">http://www.dianovasco.com/20110705/local/heridos-leves-picaduras-medusas-201107051840.html</a>                                                                                                                       |  |
| 4  | 7  | 2011 | 2   | 43.3177 | -2.0011  | Ondarreta                        | Guipúzcoa        | <a href="http://www.dianovasco.com/20110705/local/heridos-leves-picaduras-medusas-201107051840.html">http://www.dianovasco.com/20110705/local/heridos-leves-picaduras-medusas-201107051840.html</a>                                                                                                                       |  |
| 5  | 7  | 2011 | 4   | 43.3151 | -2.0506  | Iqueldo                          | Guipúzcoa        | <a href="http://www.dianovasco.com/20110705/local/heridos-leves-picaduras-medusas-201107051840.html">http://www.dianovasco.com/20110705/local/heridos-leves-picaduras-medusas-201107051840.html</a>                                                                                                                       |  |
| 7  | 7  | 2011 | 3   | 43.3287 | -2.3887  | Ondarroa                         | Vizcaya          | <a href="http://www.adn.es/local/bilbao/20110708/NWS-0222-Alerta-mejillones-medusas-cebra.html">http://www.adn.es/local/bilbao/20110708/NWS-0222-Alerta-mejillones-medusas-cebra.html</a>                                                                                                                                 |  |
| 8  | 7  | 2011 | 4   | 43.4646 | -3.7729  | Magdalena                        | Cantabria        | <a href="http://www.dianoriontanes.es/v/20110709/cantabria/otras-noticias/carabela-portuguesa-llaga-costa-20110709.html">http://www.dianoriontanes.es/v/20110709/cantabria/otras-noticias/carabela-portuguesa-llaga-costa-20110709.html</a>                                                                               |  |
| 9  | 7  | 2011 | 5   | 43.3875 | -3.2224  | Castro Urdiales                  | Cantabria        | <a href="http://www.dianoriontanes.es/v/20110710/cantabria/otras-noticias/carabelas-portuguesas-Invaden-playas-20110710.html">http://www.dianoriontanes.es/v/20110710/cantabria/otras-noticias/carabelas-portuguesas-Invaden-playas-20110710.html</a>                                                                     |  |
| 12 | 7  | 2011 | 5   | 43.3177 | -2.0011  | Ondarreta                        | Guipúzcoa        | <a href="http://www.20minutos.es/noticia/1108752/0/">http://www.20minutos.es/noticia/1108752/0/</a>                                                                                                                                                                                                                       |  |
| 14 | 7  | 2011 | 5   | 43.2878 | -2.1707  | Zarautz                          | Guipúzcoa        | <a href="http://www.dianovasco.com/v/20110714/bajo-deba/carabela-portuguesa-llagada-playas-20110714.html">http://www.dianovasco.com/v/20110714/bajo-deba/carabela-portuguesa-llagada-playas-20110714.html</a>                                                                                                             |  |
| 19 | 7  | 2011 | 5   | 43.3288 | -1.9759  | Zurriola                         | Guipúzcoa        | <a href="http://www.dianovasco.com/v/20110720/al-dia-local/legan-carabelas-sebastian-20110720.html">http://www.dianovasco.com/v/20110720/al-dia-local/legan-carabelas-sebastian-20110720.html</a>                                                                                                                         |  |
| 8  | 10 | 2011 | 3   | 28.1076 | -15.7070 | Las Salinas (Agaete)             | Gran Canaria     | <a href="http://www.infonortedigital.com/portada/component/content/article/6-interes/8605-advienten-del-peligro-de-medusas-en-la-zona-de-las-salinas-en-agaete">http://www.infonortedigital.com/portada/component/content/article/6-interes/8605-advienten-del-peligro-de-medusas-en-la-zona-de-las-salinas-en-agaete</a> |  |
| 12 | 5  | 2012 | 4   | 41.5629 | 2.5201   | Sant Vicenç de Montalt           | Barcelona        | <a href="http://www.lavanguardia.com/medio-ambiente/20120512/5429301130/medusas-playa-sant-vicenç-de-montalt.html">http://www.lavanguardia.com/medio-ambiente/20120512/5429301130/medusas-playa-sant-vicenç-de-montalt.html</a>                                                                                           |  |
| 20 | 8  | 2012 | 5   | 43.5532 | -6.3696  | Cadavedo, Valdés                 | Asturias         | <a href="http://www.abc.es/20120821/sociedad/abci-medusas-playas-asturias-galicia-20120821008.html">http://www.abc.es/20120821/sociedad/abci-medusas-playas-asturias-galicia-20120821008.html</a>                                                                                                                         |  |
| 20 | 8  | 2012 | 5   | 43.5532 | -6.3696  | Cadavedo, Valdés                 | Asturias         | <a href="http://www.abc.es/20120821/sociedad/abci-medusas-playas-asturias-galicia-20120821008.html">http://www.abc.es/20120821/sociedad/abci-medusas-playas-asturias-galicia-20120821008.html</a>                                                                                                                         |  |
| 5  | 9  | 2012 | 5   | 43.5546 | -7.1487  | Esteiro, Ribadeo                 | Lugo             | <a href="http://www.lavozdegalicia.es/noticia/amarina/2012/09/06/playas-ribadeo-barreiros-foz-burela-plagadas-medusas/0003_201209X6C7996.htm">http://www.lavozdegalicia.es/noticia/amarina/2012/09/06/playas-ribadeo-barreiros-foz-burela-plagadas-medusas/0003_201209X6C7996.htm</a>                                     |  |
| 5  | 9  | 2012 | 5   | 43.5566 | -7.1368  | As Illas, Ribadeo                | Lugo             | <a href="http://www.lavozdegalicia.es/noticia/amarina/2012/09/06/playas-ribadeo-barreiros-foz-burela-plagadas-medusas/0003_201209X6C7996.htm">http://www.lavozdegalicia.es/noticia/amarina/2012/09/06/playas-ribadeo-barreiros-foz-burela-plagadas-medusas/0003_201209X6C7996.htm</a>                                     |  |
| 5  | 9  | 2012 | 5   | 43.5295 | -7.0417  | Os Bloques, Ribadeo              | Lugo             | <a href="http://www.lavozdegalicia.es/noticia/amarina/2012/09/06/playas-ribadeo-barreiros-foz-burela-plagadas-medusas/0003_201209X6C7996.htm">http://www.lavozdegalicia.es/noticia/amarina/2012/09/06/playas-ribadeo-barreiros-foz-burela-plagadas-medusas/0003_201209X6C7996.htm</a>                                     |  |
| 5  | 9  | 2012 | 5   | 43.5559 | -7.1342  | Os Castro, Ribadeo               | Lugo             | <a href="http://www.lavozdegalicia.es/noticia/amarina/2012/09/06/playas-ribadeo-barreiros-foz-burela-plagadas-medusas/0003_201209X6C7996.htm">http://www.lavozdegalicia.es/noticia/amarina/2012/09/06/playas-ribadeo-barreiros-foz-burela-plagadas-medusas/0003_201209X6C7996.htm</a>                                     |  |
| 5  | 9  | 2012 | 5   | 43.5550 | -7.1613  | As Catedrais, Ribadeo            | Lugo             | <a href="http://www.lavozdegalicia.es/noticia/amarina/2012/09/06/playas-ribadeo-barreiros-foz-burela-plagadas-medusas/0003_201209X6C7996.htm">http://www.lavozdegalicia.es/noticia/amarina/2012/09/06/playas-ribadeo-barreiros-foz-burela-plagadas-medusas/0003_201209X6C7996.htm</a>                                     |  |
| 5  | 9  | 2012 | 5   | 43.5612 | -7.1907  | Barreiros                        | Lugo             | <a href="http://www.lavozdegalicia.es/noticia/amarina/2012/09/06/playas-ribadeo-barreiros-foz-burela-plagadas-medusas/0003_201209X6C7996.htm">http://www.lavozdegalicia.es/noticia/amarina/2012/09/06/playas-ribadeo-barreiros-foz-burela-plagadas-medusas/0003_201209X6C7996.htm</a>                                     |  |
| 5  | 9  | 2012 | 5   | 43.5786 | -7.2493  | A Rapadoira, Foz                 | Lugo             | <a href="http://www.lavozdegalicia.es/noticia/amarina/2012/09/06/playas-ribadeo-barreiros-foz-burela-plagadas-medusas/0003_201209X6C7996.htm">http://www.lavozdegalicia.es/noticia/amarina/2012/09/06/playas-ribadeo-barreiros-foz-burela-plagadas-medusas/0003_201209X6C7996.htm</a>                                     |  |
| 5  | 9  | 2012 | 5   | 43.5814 | -7.2606  | Llas, Foz                        | Lugo             | <a href="http://www.lavozdegalicia.es/noticia/amarina/2012/09/06/playas-ribadeo-barreiros-foz-burela-plagadas-medusas/0003_201209X6C7996.htm">http://www.lavozdegalicia.es/noticia/amarina/2012/09/06/playas-ribadeo-barreiros-foz-burela-plagadas-medusas/0003_201209X6C7996.htm</a>                                     |  |
| 5  | 9  | 2012 | 5   | 43.5887 | -7.2785  | Peizas, Foz                      | Lugo             | <a href="http://www.lavozdegalicia.es/noticia/amarina/2012/09/06/playas-ribadeo-barreiros-foz-burela-plagadas-medusas/0003_201209X6C7996.htm">http://www.lavozdegalicia.es/noticia/amarina/2012/09/06/playas-ribadeo-barreiros-foz-burela-plagadas-medusas/0003_201209X6C7996.htm</a>                                     |  |
| 5  | 9  | 2012 | 5   | 43.6735 | -7.3629  | Ril, Burela                      | Lugo             | <a href="http://www.lavozdegalicia.es/noticia/amarina/2012/09/06/playas-ribadeo-barreiros-foz-burela-plagadas-medusas/0003_201209X6C7996.htm">http://www.lavozdegalicia.es/noticia/amarina/2012/09/06/playas-ribadeo-barreiros-foz-burela-plagadas-medusas/0003_201209X6C7996.htm</a>                                     |  |
| 5  | 9  | 2012 | 5   | 43.6640 | -7.3560  | Penaural, Burela                 | Lugo             | <a href="http://www.lavozdegalicia.es/noticia/amarina/2012/09/06/playas-ribadeo-barreiros-foz-burela-plagadas-medusas/0003_201209X6C7996.htm">http://www.lavozdegalicia.es/noticia/amarina/2012/09/06/playas-ribadeo-barreiros-foz-burela-plagadas-medusas/0003_201209X6C7996.htm</a>                                     |  |
| 5  | 9  | 2012 | 5   | 43.6663 | -7.3565  | O Portelo, Burela                | Lugo             | <a href="http://www.lavozdegalicia.es/noticia/amarina/2012/09/06/playas-ribadeo-barreiros-foz-burela-plagadas-medusas/0003_201209X6C7996.htm">http://www.lavozdegalicia.es/noticia/amarina/2012/09/06/playas-ribadeo-barreiros-foz-burela-plagadas-medusas/0003_201209X6C7996.htm</a>                                     |  |
| 6  | 9  | 2012 | 5   | 43.5546 | -7.1487  | Esteiro, Ribadeo                 | Lugo             | <a href="http://www.lavozdegalicia.es/noticia/galicia/2012/09/06/plaga-medusas-mantiene-cerradas-20-playas-marina/0003134696167995768212.htm">http://www.lavozdegalicia.es/noticia/galicia/2012/09/06/plaga-medusas-mantiene-cerradas-20-playas-marina/0003134696167995768212.htm</a>                                     |  |
| 6  | 9  | 2012 | 5   | 43.5566 | -7.1368  | As Illas, Ribadeo                | Lugo             | <a href="http://www.lavozdegalicia.es/noticia/galicia/2012/09/06/plaga-medusas-mantiene-cerradas-20-playas-marina/0003134696167995768212.htm">http://www.lavozdegalicia.es/noticia/galicia/2012/09/06/plaga-medusas-mantiene-cerradas-20-playas-marina/0003134696167995768212.htm</a>                                     |  |

|    |   |      |   |         |                               |          |                                                                                                                                                                                                                                                                                             |
|----|---|------|---|---------|-------------------------------|----------|---------------------------------------------------------------------------------------------------------------------------------------------------------------------------------------------------------------------------------------------------------------------------------------------|
| 6  | 9 | 2012 | 5 | 43.5295 | -7.0417 Os Bloques, Ribadeo   | Lugo     | <a href="http://www.lavozdeg Galicia.es/noticia/galicia/2012/09/06/plaga-medusas-mantiene-cerradas-20-playas-marina/00031346961679957608212.htm">http://www.lavozdeg Galicia.es/noticia/galicia/2012/09/06/plaga-medusas-mantiene-cerradas-20-playas-marina/00031346961679957608212.htm</a> |
| 6  | 9 | 2012 | 5 | 43.5559 | -7.1342 Os Castro, Ribadeo    | Lugo     | <a href="http://www.lavozdeg Galicia.es/noticia/galicia/2012/09/06/plaga-medusas-mantiene-cerradas-20-playas-marina/00031346961679957608212.htm">http://www.lavozdeg Galicia.es/noticia/galicia/2012/09/06/plaga-medusas-mantiene-cerradas-20-playas-marina/00031346961679957608212.htm</a> |
| 6  | 9 | 2012 | 5 | 43.5550 | -7.1613 As Catedrais, Ribadeo | Lugo     | <a href="http://www.lavozdeg Galicia.es/noticia/galicia/2012/09/06/plaga-medusas-mantiene-cerradas-20-playas-marina/00031346961679957608212.htm">http://www.lavozdeg Galicia.es/noticia/galicia/2012/09/06/plaga-medusas-mantiene-cerradas-20-playas-marina/00031346961679957608212.htm</a> |
| 6  | 9 | 2012 | 5 | 43.5612 | -7.1907 Barreiros             | Lugo     | <a href="http://www.lavozdeg Galicia.es/noticia/galicia/2012/09/06/plaga-medusas-mantiene-cerradas-20-playas-marina/00031346961679957608212.htm">http://www.lavozdeg Galicia.es/noticia/galicia/2012/09/06/plaga-medusas-mantiene-cerradas-20-playas-marina/00031346961679957608212.htm</a> |
| 6  | 9 | 2012 | 5 | 43.5786 | -7.2493 A Rapadoira, Foz      | Lugo     | <a href="http://www.lavozdeg Galicia.es/noticia/galicia/2012/09/06/plaga-medusas-mantiene-cerradas-20-playas-marina/00031346961679957608212.htm">http://www.lavozdeg Galicia.es/noticia/galicia/2012/09/06/plaga-medusas-mantiene-cerradas-20-playas-marina/00031346961679957608212.htm</a> |
| 6  | 9 | 2012 | 5 | 43.5814 | -7.2606 Llas, Foz             | Lugo     | <a href="http://www.lavozdeg Galicia.es/noticia/galicia/2012/09/06/plaga-medusas-mantiene-cerradas-20-playas-marina/00031346961679957608212.htm">http://www.lavozdeg Galicia.es/noticia/galicia/2012/09/06/plaga-medusas-mantiene-cerradas-20-playas-marina/00031346961679957608212.htm</a> |
| 6  | 9 | 2012 | 5 | 43.5887 | -7.2785 Peizas, Foz           | Lugo     | <a href="http://www.lavozdeg Galicia.es/noticia/galicia/2012/09/06/plaga-medusas-mantiene-cerradas-20-playas-marina/00031346961679957608212.htm">http://www.lavozdeg Galicia.es/noticia/galicia/2012/09/06/plaga-medusas-mantiene-cerradas-20-playas-marina/00031346961679957608212.htm</a> |
| 6  | 9 | 2012 | 5 | 43.6735 | -7.3629 Ril, Burela           | Lugo     | <a href="http://www.lavozdeg Galicia.es/noticia/galicia/2012/09/06/plaga-medusas-mantiene-cerradas-20-playas-marina/00031346961679957608212.htm">http://www.lavozdeg Galicia.es/noticia/galicia/2012/09/06/plaga-medusas-mantiene-cerradas-20-playas-marina/00031346961679957608212.htm</a> |
| 6  | 9 | 2012 | 5 | 43.6640 | -7.3560 Penaural, Burela      | Lugo     | <a href="http://www.lavozdeg Galicia.es/noticia/galicia/2012/09/06/plaga-medusas-mantiene-cerradas-20-playas-marina/00031346961679957608212.htm">http://www.lavozdeg Galicia.es/noticia/galicia/2012/09/06/plaga-medusas-mantiene-cerradas-20-playas-marina/00031346961679957608212.htm</a> |
| 6  | 9 | 2012 | 5 | 43.6663 | -7.3565 O Portelo, Burela     | Lugo     | <a href="http://www.lavozdeg Galicia.es/noticia/galicia/2012/09/06/plaga-medusas-mantiene-cerradas-20-playas-marina/00031346961679957608212.htm">http://www.lavozdeg Galicia.es/noticia/galicia/2012/09/06/plaga-medusas-mantiene-cerradas-20-playas-marina/00031346961679957608212.htm</a> |
| 7  | 9 | 2012 | 5 | 43.5546 | -7.1487 Esteiro, Ribadeo      | Lugo     | <a href="http://www.abc.es/agencias/noticia.asp?noticia=1245907">http://www.abc.es/agencias/noticia.asp?noticia=1245907</a>                                                                                                                                                                 |
| 7  | 9 | 2012 | 5 | 43.5566 | -7.1368 As Illas, Ribadeo     | Lugo     | <a href="http://www.abc.es/agencias/noticia.asp?noticia=1245908">http://www.abc.es/agencias/noticia.asp?noticia=1245908</a>                                                                                                                                                                 |
| 7  | 9 | 2012 | 5 | 43.5295 | -7.0417 Os Bloques, Ribadeo   | Lugo     | <a href="http://www.abc.es/agencias/noticia.asp?noticia=1245909">http://www.abc.es/agencias/noticia.asp?noticia=1245909</a>                                                                                                                                                                 |
| 7  | 9 | 2012 | 5 | 43.5559 | -7.1342 Os Castro, Ribadeo    | Lugo     | <a href="http://www.abc.es/agencias/noticia.asp?noticia=1245910">http://www.abc.es/agencias/noticia.asp?noticia=1245910</a>                                                                                                                                                                 |
| 7  | 9 | 2012 | 5 | 43.5550 | -7.1613 As Catedrais, Ribadeo | Lugo     | <a href="http://www.abc.es/agencias/noticia.asp?noticia=1245911">http://www.abc.es/agencias/noticia.asp?noticia=1245911</a>                                                                                                                                                                 |
| 7  | 9 | 2012 | 5 | 43.5612 | -7.1907 Barreiros             | Lugo     | <a href="http://www.abc.es/agencias/noticia.asp?noticia=1245912">http://www.abc.es/agencias/noticia.asp?noticia=1245912</a>                                                                                                                                                                 |
| 7  | 9 | 2012 | 5 | 43.5786 | -7.2493 A Rapadoira, Foz      | Lugo     | <a href="http://www.abc.es/agencias/noticia.asp?noticia=1245913">http://www.abc.es/agencias/noticia.asp?noticia=1245913</a>                                                                                                                                                                 |
| 7  | 9 | 2012 | 5 | 43.5814 | -7.2606 Llas, Foz             | Lugo     | <a href="http://www.abc.es/agencias/noticia.asp?noticia=1245914">http://www.abc.es/agencias/noticia.asp?noticia=1245914</a>                                                                                                                                                                 |
| 7  | 9 | 2012 | 5 | 43.5887 | -7.2785 Peizas, Foz           | Lugo     | <a href="http://www.abc.es/agencias/noticia.asp?noticia=1245915">http://www.abc.es/agencias/noticia.asp?noticia=1245915</a>                                                                                                                                                                 |
| 7  | 9 | 2012 | 5 | 43.6735 | -7.3629 Ril, Burela           | Lugo     | <a href="http://www.abc.es/agencias/noticia.asp?noticia=1245916">http://www.abc.es/agencias/noticia.asp?noticia=1245916</a>                                                                                                                                                                 |
| 7  | 9 | 2012 | 5 | 43.6640 | -7.3560 Penaural, Burela      | Lugo     | <a href="http://www.abc.es/agencias/noticia.asp?noticia=1245917">http://www.abc.es/agencias/noticia.asp?noticia=1245917</a>                                                                                                                                                                 |
| 7  | 9 | 2012 | 5 | 43.6663 | -7.3565 O Portelo, Burela     | Lugo     | <a href="http://www.abc.es/agencias/noticia.asp?noticia=1245918">http://www.abc.es/agencias/noticia.asp?noticia=1245918</a>                                                                                                                                                                 |
| 26 | 9 | 2012 | 5 | 43.5451 | -5.6531 San Lorenzo, Gijón    | Asturias | <a href="http://www.elcomercio.es/v/20120927/gijon/plaga-medusas-obliga-cerrar-20120927.html">http://www.elcomercio.es/v/20120927/gijon/plaga-medusas-obliga-cerrar-20120927.html</a>                                                                                                       |
| 29 | 9 | 2012 | 5 | 43.5451 | -5.6531 San Lorenzo, Gijón    | Asturias | <a href="http://www.elcomercio.es/v/20120930/gijon/medusas-cierran-playas-20120930.html">http://www.elcomercio.es/v/20120930/gijon/medusas-cierran-playas-20120930.html</a>                                                                                                                 |
| 29 | 9 | 2012 | 5 | 43.5455 | -5.6925 Arbeyal, Gijón        | Asturias | <a href="http://www.elcomercio.es/v/20120930/gijon/medusas-cierran-playas-20120930.html">http://www.elcomercio.es/v/20120930/gijon/medusas-cierran-playas-20120930.html</a>                                                                                                                 |
| 29 | 9 | 2012 | 5 | 43.5432 | -5.6709 Poniente, Gijón       | Asturias | <a href="http://www.elcomercio.es/v/20120930/gijon/medusas-cierran-playas-20120930.html">http://www.elcomercio.es/v/20120930/gijon/medusas-cierran-playas-20120930.html</a>                                                                                                                 |
| 29 | 9 | 2012 | 5 | 43.5874 | -5.7594 Candás                | Asturias | <a href="http://www.elcomercio.es/v/20120930/gijon/medusas-cierran-playas-20120930.html">http://www.elcomercio.es/v/20120930/gijon/medusas-cierran-playas-20120930.html</a>                                                                                                                 |

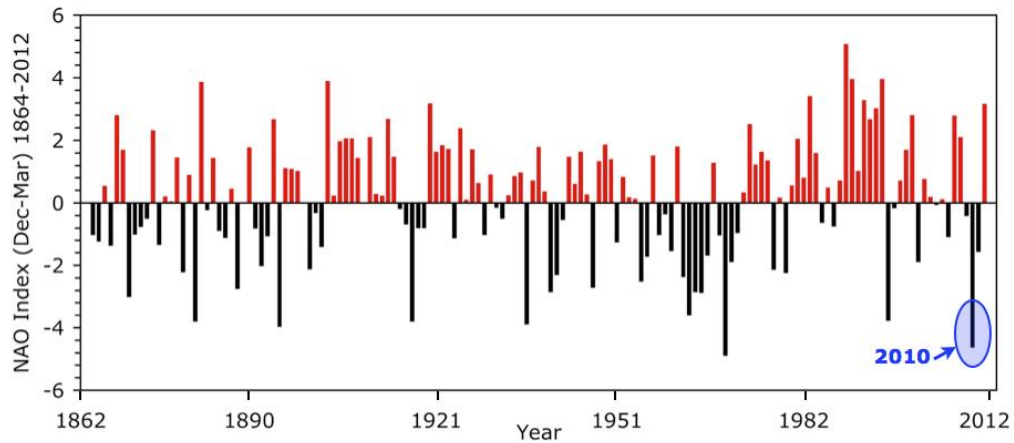

**Supplementary Figure 1 | Winter North Atlantic Oscillation index.** Winter index of NAO based on the difference of the normalized sea level pressure (SLP) between Lisbon, Portugal and Stykkisholmur/Reykjavik, Iceland, since 1864. The station index value for year N refers to an average of December of year N-1 and January, February and March year of N. The SLP anomalies at each station were normalized by the division of each seasonal mean pressure by the long-term mean (1864-1983) standard deviation. Normalization is used to avoid the series being dominated by the greater variability of the northern station. (From Hurrell, 2012<sup>6</sup>).

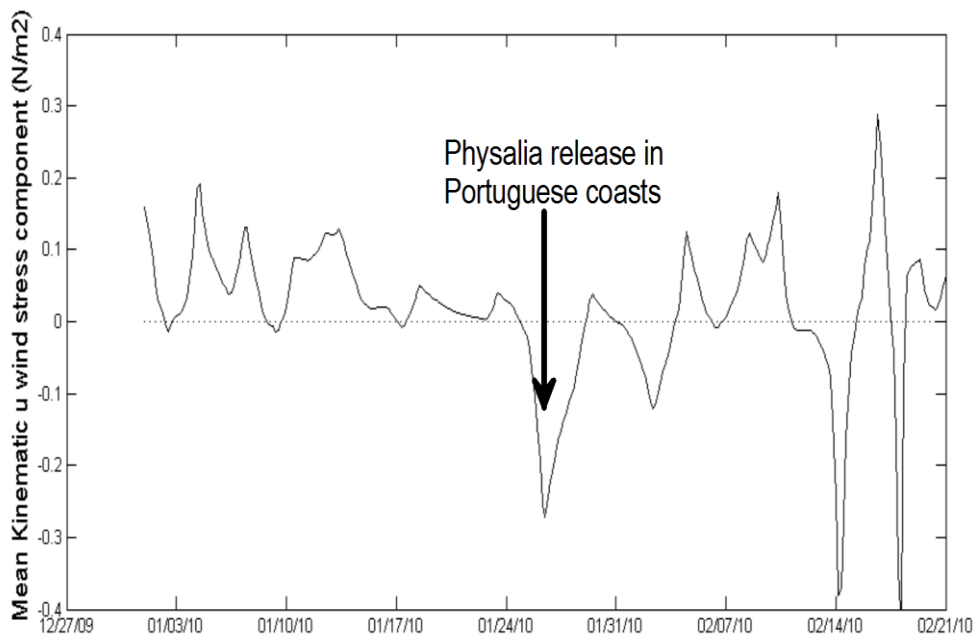

**Supplementary Figure 2 | Wind pattern along the southwest Portugal shore.**

Daily mean kinematic wind stress (u component) at  $-10^{\circ}\text{W}$  between  $37^{\circ}$  and  $38^{\circ}\text{N}$  one month before the main stranding event of *P. physalis* at the Doñana National Park shore. Westerlies are denoted by positive values and easterlies by negative values.

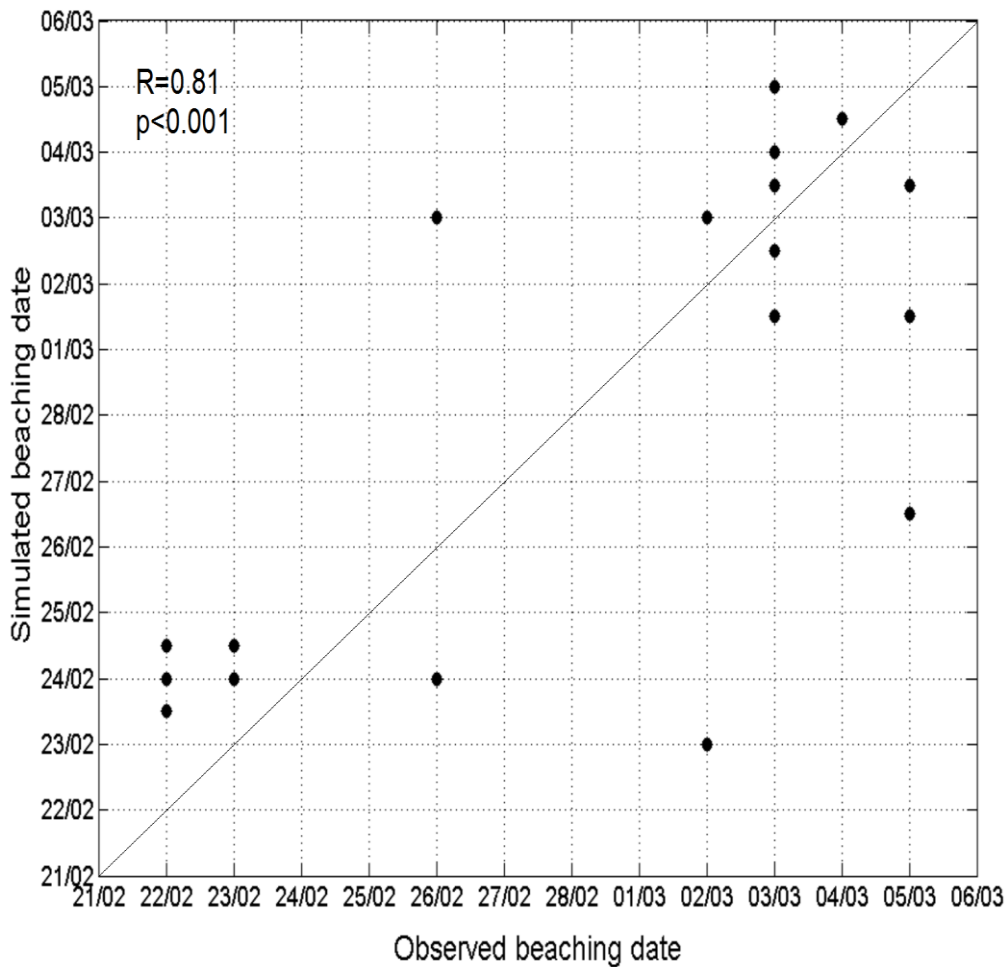

**Supplementary Figure 3 | Comparison between observed and simulated beaching data of Portuguese Man-of-War.** The oceanic population of *P. physalis* started to appear as stranded on the beach on 22 February 2010. The observations on the coast occurred from west to east, advancing toward the Mediterranean, passing through the Strait of Gibraltar and to the easternmost Alboran Sea. The observed timing of beaching is highly correlated to the simulated timing ( $r=0.81$ ,  $p<0.001$ ,  $n= 18$ ).
